# Supplementary material for: A computational protocol for the calculation of the standard reduction potential of iron complexes: application to Fe2+/3+-Aβ model systems relevant to Alzheimer's disease
Source: Royal Society of Chemistry journal article supplement (doi:10.1039/d2ra03907a), 2022-01-01
Supplement: d2ra03907a1.pdf [file d2ra03907a1.pdf]

# Electronic Supporting Information

## **A Computational Protocol for the Calculation of Standard Reduction Potential of Iron Complexes: Application to Fe<sup>2+/3+</sup>-A $\beta$ Model Systems Relevant to Alzheimer's Disease**

Adrián L. Orjuela,<sup>a</sup> Francisco Núñez-Zarur,<sup>b,\*</sup> Jorge Alí-Torres<sup>a,\*</sup>

<sup>a</sup>Departamento de Química, Universidad Nacional de Colombia-Sede Bogotá, 111321,  
Colombia.

<sup>b</sup>Facultad de Ciencias Básicas, Universidad de Medellín, Carrera 87 N° 30-65, 050026  
Medellín, Colombia.

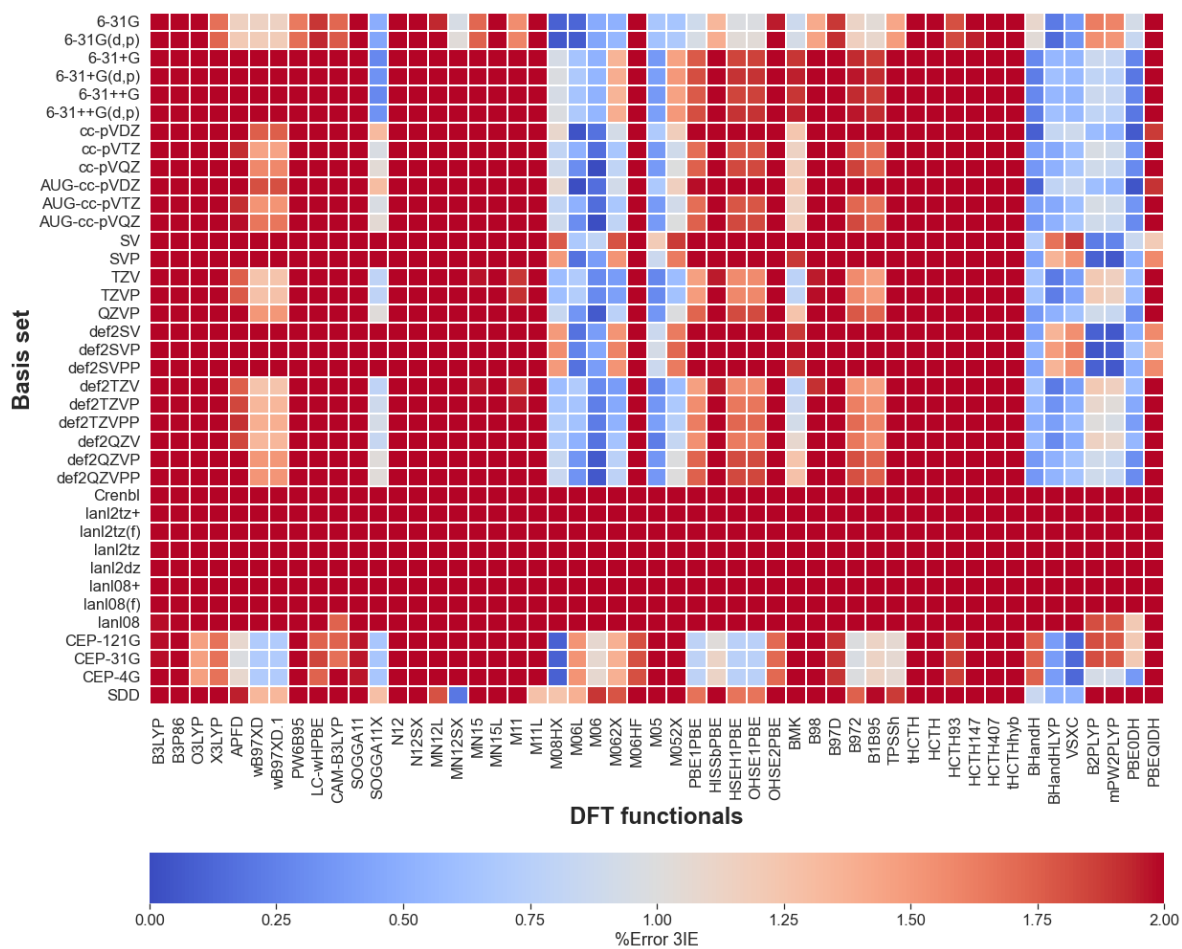

**Figure S1.** Heatmap for %Error Iron third ionization energy calculated with DFT functionals and basis sets. Iron third ionization energy experimental value is  $707.42 \text{ kcal mol}^{-1}$ .<sup>1</sup>

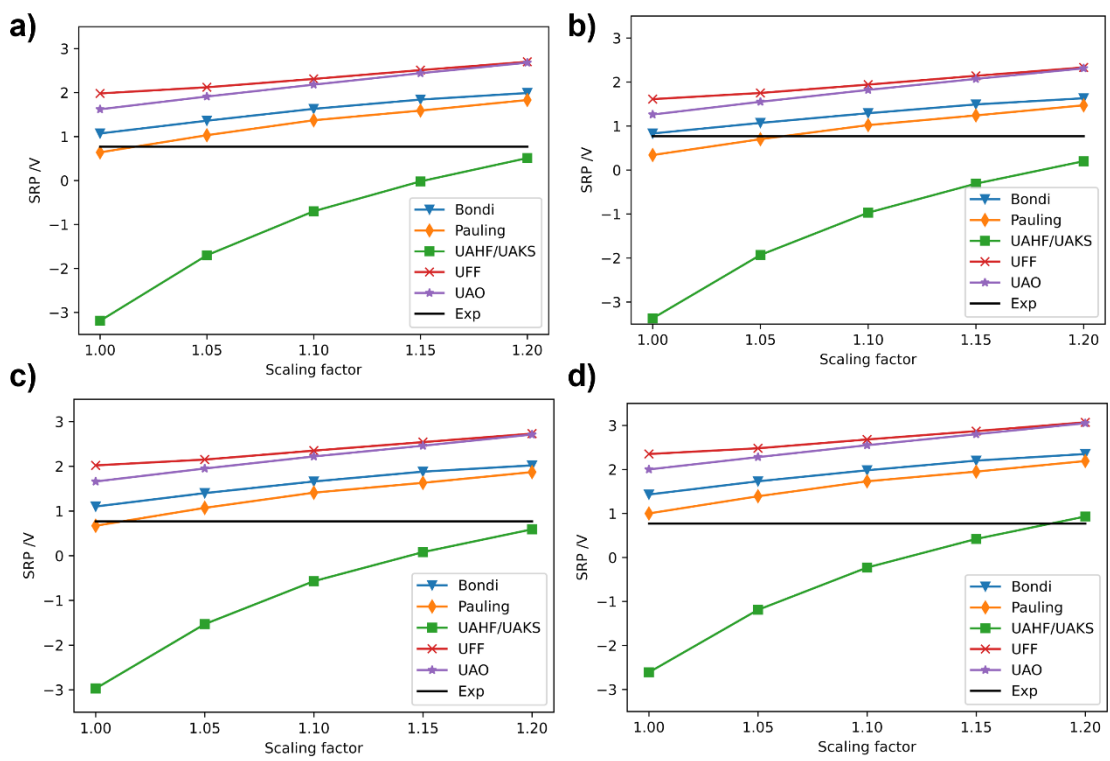

**Figure S2.** Calculated SRP of  $[\text{Fe}(\text{H}_2\text{O})_6]^{3+}$  complex using C-PCM solvent model at a) M06/cc-pVQZ(Fe)-6-31+G(*d,p*)(O, H); b) M06L/cc-pVDZ(Fe)-6-31+G(*d,p*)(O, H); c) M06/6-31+G(*d,p*); d) B3LYP/6-31+G(*d,p*) levels of theory. Experimental SRP for  $[\text{Fe}(\text{H}_2\text{O})_6]^{3+}$  is 0.77 V (solid black line).<sup>2</sup>

**Table S1.** Iron third ionization energy absolute errors calculated with different DFT functionals and basis sets. Only errors below 4 kcal mol<sup>-1</sup> are presented. Iron third ionization energy experimental value is 707.42 kcal mol<sup>-1</sup>.<sup>1</sup>

| Basis set           | M08HX | M06L  | M06   | M062X | M06HF | M05   | M052X |
|---------------------|-------|-------|-------|-------|-------|-------|-------|
| <b>6-31G</b>        | 0.096 | 0.123 | 0.472 | 0.510 | 2.077 | 0.658 | 0.649 |
| <b>6-31G(d,p)</b>   | 0.059 | 0.074 | 0.440 | 0.553 | 2.125 | 0.629 | 0.691 |
| <b>6-31+G</b>       | 0.941 | 0.642 | 0.516 | 1.353 | 2.984 | 0.372 | 1.460 |
| <b>6-31+G(d,p)</b>  | 0.977 | 0.689 | 0.546 | 1.393 | 3.030 | 0.399 | 1.500 |
| <b>6-31++G</b>      | 0.941 | 0.642 | 0.516 | 1.353 | 2.984 | 0.372 | 1.460 |
| <b>6-31++G(d,p)</b> | 0.977 | 0.689 | 0.546 | 1.393 | 3.030 | 0.399 | 1.500 |
| <b>cc-pVDZ</b>      | 1.090 | 0.034 | 0.174 | 0.927 | 3.028 | 0.699 | 1.174 |
| <b>cc-pVTZ</b>      | 0.807 | 0.515 | 0.160 | 0.663 | 2.940 | 0.373 | 0.904 |
| <b>cc-pVQZ</b>      | 0.883 | 0.306 | 0.005 | 0.801 | 3.214 | 0.375 | 0.999 |
| <b>AUG-cc-pVDZ</b>  | 1.079 | 0.048 | 0.158 | 0.910 | 3.025 | 0.686 | 1.161 |
| <b>AUG-cc-pVTZ</b>  | 0.809 | 0.508 | 0.156 | 0.667 | 2.949 | 0.378 | 0.907 |
| <b>AUG-cc-pVQZ</b>  | 0.884 | 0.305 | 0.083 | 0.801 | 3.225 | 0.375 | 0.999 |
| <b>SV</b>           | 1.770 | 0.680 | 0.803 | 1.802 | 3.822 | 1.196 | 1.878 |
| <b>SVP</b>          | 1.497 | 0.173 | 0.393 | 1.531 | 3.734 | 0.869 | 1.637 |
| <b>TZV</b>          | 0.587 | 0.706 | 0.290 | 0.383 | 2.788 | 0.280 | 0.593 |
| <b>TZVP</b>         | 0.603 | 0.726 | 0.292 | 0.414 | 2.851 | 0.294 | 0.626 |
| <b>QZVP</b>         | 0.846 | 0.350 | 0.068 | 0.771 | 3.032 | 0.356 | 0.991 |
| <b>def2SV</b>       | 1.497 | 0.173 | 0.393 | 1.531 | 3.734 | 0.869 | 1.637 |
| <b>def2SVP</b>      | 1.562 | 0.261 | 0.454 | 1.604 | 3.821 | 0.932 | 1.721 |
| <b>def2SVPP</b>     | 1.497 | 0.173 | 0.393 | 1.531 | 3.734 | 0.869 | 1.637 |
| <b>def2TZV</b>      | 0.587 | 0.706 | 0.290 | 0.383 | 2.788 | 0.280 | 0.593 |
| <b>def2TZVP</b>     | 0.653 | 0.645 | 0.240 | 0.464 | 2.903 | 0.358 | 0.685 |
| <b>def2TZVPP</b>    | 0.720 | 0.631 | 0.225 | 0.518 | 2.992 | 0.399 | 0.749 |
| <b>def2QZV</b>      | 0.699 | 0.512 | 0.184 | 0.633 | 2.858 | 0.233 | 0.830 |
| <b>def2QZVP</b>     | 0.846 | 0.350 | 0.068 | 0.771 | 3.032 | 0.356 | 0.991 |
| <b>def2QZVPP</b>    | 0.857 | 0.340 | 0.060 | 0.782 | 3.043 | 0.363 | 1.002 |

**Table S2.** Training set information with solvent and standard reduction potential

| <b>Complex</b> | <b>Iron complex formula</b>                           | <b>SRP (V)</b> | <b>Solvent</b> | <b>Ref</b> |
|----------------|-------------------------------------------------------|----------------|----------------|------------|
| <b>1</b>       | [Fe(phen) <sub>3</sub> ]                              | 1.15           | Water          | 3          |
| <b>2</b>       | [Fe(bpy) <sub>3</sub> ]                               | 1.03           | Water          | 3          |
| <b>3</b>       | [Fe(Py <sub>2</sub> Py) <sub>2</sub> ]                | 1.30           | Acetonitrile   | 4          |
| <b>4</b>       | [Fe(Py <sub>2</sub> pep) <sub>2</sub> ]               | -0.04          | Water          | 5          |
| <b>5</b>       | [Fe(Pr <sub>2</sub> pep) <sub>2</sub> ]               | 0.18           | Water          | 6          |
| <b>6</b>       | [Fe(Py <sub>2</sub> pepO) <sub>2</sub> ]              | -0.84          | DMF            | 7          |
| <b>7</b>       | [Fe(PyIm <sub>2</sub> H <sub>2</sub> ) <sub>2</sub> ] | -0.46          | Acetonitrile   | 8          |
| <b>8</b>       | [Fe(sar)]                                             | 0.05           | Water          | 9          |
| <b>9</b>       | [Fe(diammac)]                                         | -0.15          | Water          | 9          |
| <b>10</b>      | [Fe(tacn) <sub>2</sub> ]                              | 0.13           | Water          | 10         |
| <b>11</b>      | [Fe(EDTA)]                                            | 0.1            | Water          | 2          |
| <b>12</b>      | [Fe(PaPy <sub>2</sub> O)(Cl)]                         | -0.27          | DMF            | 7          |
| <b>13</b>      | [Fe(NTA)(H <sub>2</sub> O) <sub>2</sub> ]             | 0.37           | Water          | 2          |
| <b>14</b>      | [Fe(Py <sub>3</sub> tacn)]                            | 0.97           | Acetonitrile   | 11         |
| <b>15</b>      | [Fe(bpy)CN <sub>4</sub> ]                             | 0.54           | Water          | 12         |
| <b>16</b>      | [Fe(DITim) <sub>2</sub> ]                             | -0.44          | Acetonitrile   | 13         |
| <b>17</b>      | [Fe(H <sub>2</sub> O) <sub>6</sub> ]                  | 0.77           | Water          | 2          |

**Table S3.** Relative energies (kcal/mol), charge and spin multiplicity of all Fe<sup>2+</sup>/Fe<sup>3+</sup> complexes considered here (Figure 5 of main manuscript).

| Complex  | Designation                                           | Iron charge | Multiplicity | $\Delta E_{\text{SCF}}$ | $\Delta G_{298}$ |
|----------|-------------------------------------------------------|-------------|--------------|-------------------------|------------------|
| <b>1</b> | [Fe(phen) <sub>3</sub> ]                              | 3           | 6            | 9.6                     | 5.0              |
|          |                                                       |             | 2            | 0.0                     | 0.0              |
|          |                                                       | 2           | 5            | 4.8                     | 0.0              |
|          |                                                       |             | 1            | 0.0                     | 1.6              |
| <b>2</b> | [Fe(bpy) <sub>3</sub> ]                               | 3           | 6            | 11.4                    | 6.8              |
|          |                                                       |             | 2            | 0.0                     | 0.0              |
|          |                                                       | 2           | 5            | 6.3                     | 0.0              |
|          |                                                       |             | 1            | 0.0                     | 0.7              |
| <b>3</b> | [Fe(Py <sub>r2</sub> Py) <sub>2</sub> ]               | 3           | 6            | 7.2                     | 3.4              |
|          |                                                       |             | 2            | 0.0                     | 0.0              |
|          |                                                       | 2           | 5            | 5.9                     | 0.0              |
|          |                                                       |             | 1            | 0.0                     | 0.6              |
| <b>4</b> | [Fe(Py <sub>pep</sub> ) <sub>2</sub> ]                | 3           | 6            | 8.0                     | 2.8              |
|          |                                                       |             | 2            | 0.0                     | 0.0              |
|          |                                                       | 2           | 5            | 0.0                     | 0.0              |
|          |                                                       |             | 1            | 0.2                     | 7.2              |
| <b>5</b> | [Fe(Pr <sub>pep</sub> ) <sub>2</sub> ]                | 3           | 6            | 5.0                     | 0.0              |
|          |                                                       |             | 2            | 0.0                     | 0.1              |
|          |                                                       | 2           | 5            | 0.0                     | 0.0              |
|          |                                                       |             | 1            | 0.5                     | 7.5              |
| <b>6</b> | [Fe(Py <sub>pep</sub> O) <sub>2</sub> ]               | 3           | 6            | 0.0                     | 0.0              |
|          |                                                       |             | 2            | 4.8                     | 8.3              |
|          |                                                       | 2           | 5            | 0.0                     | 0.0              |
|          |                                                       |             | 1            | 11.4                    | 16.4             |
| <b>7</b> | [Fe(PyIm <sub>2</sub> H <sub>2</sub> ) <sub>2</sub> ] | 3           | 6            | 5.1                     | 1.5              |
|          |                                                       |             | 2            | 0.0                     | 0.0              |
|          |                                                       | 2           | 5            | 0.0                     | 0.0              |
|          |                                                       |             | 1            | 0.3                     | 6.3              |
| <b>8</b> | [Fe(sar)]                                             | 3           | 6            | 7.5                     | 4.5              |
|          |                                                       |             | 2            | 0.0                     | 0.0              |
|          |                                                       | 2           | 5            | 1.3                     | 0.0              |
|          |                                                       |             | 1            | 0.0                     | 3.7              |

**Table S3.** Continuation. Relative energies (kcal/mol), charge and spin multiplicity of all Fe<sup>2+</sup>/Fe<sup>3+</sup> complexes considered here (Figure 5 of main manuscript).

| Complex | Designation                               | Iron charge | Multiplicity | $\Delta E_{\text{SCF}}$ | $\Delta G_{298}$ |
|---------|-------------------------------------------|-------------|--------------|-------------------------|------------------|
| 9       | [Fe(diammac)]                             | 3           | 6            | 20.3                    | 15.1             |
|         |                                           |             | 2            | 0.0                     | 0.0              |
|         |                                           | 2           | 5            | 8.2                     | 2.4              |
|         |                                           |             | 1            | 0.0                     | 0.0              |
| 10      | [Fe(tacn) <sub>2</sub> ]                  | 3           | 6            | 7.4                     | 4.2              |
|         |                                           |             | 2            | 0.0                     | 0.0              |
|         |                                           | 2           | 5            | 2.4                     | 0.0              |
|         |                                           |             | 1            | 0.0                     | 2.5              |
| 11      | [Fe(EDTA)]                                | 3           | 6            | 0.0                     | 0.0              |
|         |                                           |             | 2            | 8.2                     | 10.6             |
|         |                                           | 2           | 5            | 0.0                     | 0.0              |
|         |                                           |             | 1            | 19.1                    | 24.3             |
| 12      | [Fe(PaPy <sub>2</sub> O)(Cl)]             | 3           | 6            | 0.0                     | 0.0              |
|         |                                           |             | 2            | 6.4                     | 10.3             |
|         |                                           | 2           | 5            | 0.0                     | 0.0              |
|         |                                           |             | 1            | 10.3                    | 15.3             |
| 13      | [Fe(NTA)(H <sub>2</sub> O) <sub>2</sub> ] | 3           | 6            | 0.0                     | 0.0              |
|         |                                           |             | 2            | 12.5                    | 13.8             |
|         |                                           | 2           | 5            | 0.0                     | 0.0              |
|         |                                           |             | 1            | 39.1                    | 41.9             |
| 14      | [Fe(Py <sub>3</sub> tacn)]                | 3           | 6            | 6.4                     | 2.2              |
|         |                                           |             | 2            | 0.0                     | 0.0              |
|         |                                           | 2           | 5            | 1.7                     | 0.0              |
|         |                                           |             | 1            | 0.0                     | 4.0              |
| 15      | [Fe(bpy)CN <sub>4</sub> ]                 | 3           | 6            | 21.5                    | 15.2             |
|         |                                           |             | 2            | 0.0                     | 0.0              |
|         |                                           | 2           | 5            | 18.9                    | 9.2              |
|         |                                           |             | 1            | 0.0                     | 0.0              |
| 16      | [Fe(DITim) <sub>2</sub> ]                 | 3           | 6            | 7.5                     | 3.4              |
|         |                                           |             | 2            | 0.0                     | 0.0              |
|         |                                           | 2           | 5            | 0.0                     | 0.0              |
|         |                                           |             | 1            | 9.2                     | 15.1             |
| 17      | [Fe(H <sub>2</sub> O) <sub>6</sub> ]      | 3           | 6            | 0.0                     | 0.0              |
|         |                                           |             | 2            | 30.0                    | 30.5             |
|         |                                           | 2           | 5            | 0.0                     | 0.0              |
|         |                                           |             | 1            | 29.9                    | 36.5             |

**Table S4.** Relative energies (kcal/mol), charge and spin multiplicity of the Fe<sup>2+</sup>/Fe<sup>3+</sup>-A $\beta$  complexes considered here (Figure 7 of main manuscript).

| Complex                | Designation                                                     | Iron charge | Multiplicity | $\Delta E_{\text{SCF}}$ | $\Delta G_{298}$ |
|------------------------|-----------------------------------------------------------------|-------------|--------------|-------------------------|------------------|
| <b>18<sup>2+</sup></b> | [Fe(Ohishis)(H <sub>2</sub> O) <sub>3</sub> ] <sup>2+</sup>     | 2+          | 1            | 24.4                    | 30.8             |
|                        |                                                                 |             | 3            | 18.5                    | 19.9             |
|                        |                                                                 |             | 5            | 0.0                     | 0.0              |
| <b>18<sup>3+</sup></b> | [Fe(Ohishis)(H <sub>2</sub> O) <sub>3</sub> ] <sup>3+</sup>     | 3+          | 2            | 18.2                    | 22.9             |
|                        |                                                                 |             | 4            | 10.1                    | 11.2             |
|                        |                                                                 |             | 6            | 0.0                     | 0.0              |
| <b>19<sup>2+</sup></b> | [Fe(Ohishis)(Im)(H <sub>2</sub> O) <sub>2</sub> ] <sup>2+</sup> | 2+          | 1            | 19.8                    | 26.9             |
|                        |                                                                 |             | 3            | 15.6                    | 17.0             |
|                        |                                                                 |             | 5            | 0.0                     | 0.0              |
| <b>19<sup>3+</sup></b> | [Fe(Ohishis)(Im)(H <sub>2</sub> O) <sub>2</sub> ] <sup>3+</sup> | 3+          | 2            | 11.6                    | 17.7             |
|                        |                                                                 |             | 4            | 5.7                     | 7.7              |
|                        |                                                                 |             | 6            | 0.0                     | 0.0              |
| <b>20<sup>2+</sup></b> | [Fe(Ohishis)(Ph)(H <sub>2</sub> O)] <sup>1+</sup>               | 2+          | 1            | 29.6                    | 44.3             |
|                        |                                                                 |             | 3            | 2.9                     | 13.9             |
|                        |                                                                 |             | 5            | 0.0                     | 0.0              |
| <b>20<sup>3+</sup></b> | [Fe(Nhishis)(Ph)(H <sub>2</sub> O)] <sup>1+</sup>               | 3+          | 2            | 19.0                    | 19.9             |
|                        |                                                                 |             | 4            | 5.6                     | 6.6              |
|                        |                                                                 |             | 6            | 0.0                     | 0.0              |



**Table S5.** RMSD (Å) of the optimized geometries at M06 and M06L level for representative iron complexes against B3LYP as a reference in gas phase. The ground spin states ( $2S + 1$ ) for the iron complexes are shown in parenthesis.

| Complex       | Charge | M06L  | M06   |
|---------------|--------|-------|-------|
| <b>2 (2)</b>  | 3+     | 0.042 | 0.138 |
| <b>2 (1)</b>  | 2+     | 0.055 | 0.067 |
| <b>17(6)</b>  | 3+     | 0.154 | 0.185 |
| <b>17(5)</b>  | 2+     | 0.145 | 0.158 |
| <b>13 (6)</b> | 3+     | 0.095 | 0.341 |
| <b>13 (5)</b> | 2+     | 0.182 | 0.215 |
| <b>11 (6)</b> | 3+     | 0.152 | 0.156 |
| <b>11 (5)</b> | 2+     | 0.265 | 0.314 |

**Table S6.** Calculated SRP (V) of selected iron complexes using gas and solution phase optimized geometries, SMD solvent model and direct and isodesmic methods at M06L/cc-pVDZ(Fe)-6-31+G(*d,p*)(O, H) level of theory. The ground spin states ( $2S + 1$ ) for the iron complexes are shown in parenthesis.

| Complex        | Exp   | Optimization in gas phase |           | SMD Optimization |           |
|----------------|-------|---------------------------|-----------|------------------|-----------|
|                |       | Direct                    | Isodesmic | Direct           | Isodesmic |
| <b>9 (2/1)</b> | -0.15 | -0.33                     | -0.05     | -0.23            | -0.04     |
| <b>8 (2/1)</b> | 0.05  | -0.23                     | -0.05     | -0.14            | -0.06     |

## References

- 1 A. Kramida, Yu.Ralchenko and J. Reader, NIST Atomic Spectra Database Ionization Energies Data, <https://physics.nist.gov/asd>, (accessed 5 June 2022).
- 2 S. G. Bratsch, *Standard Electrode Potentials and Temperature Coefficients in Water at 298.15 K*, 1989.
- 3 D. R. Lide, G. Baysinger, L. I. Berger, R. N. Goldberg, H. v Kehiaian, K. Kuchitsu, D. L. Roth and D. Zwillinger, *CRC Handbook of Chemistry and Physics*, CRC Press Inc., Florida, 1992.

- 4 A. Cabort, A. Michel, B. Therrien, H. Stoeckli-Evans, K. Bernauer, G. Süss-Fink, A. F. Williams and G. Stupka, *Inorganica Chim Acta*, 2003, **350**, 193–200.
- 5 Xiaolin Tao, Douglas W. Stephan and Pradip K. Mascharak, *J. Inorg. Chem.*, 1986, **26**, 755–759.
- 6 S. J. Brown, M. M. Olmstead and P. K. Mascharak, *Iron(II) and Iron(III) Complexes of N-(2-(4-Imidazolyl)ethyl)pyrimidine-4-carboxamide, a Ligand Resembling Part of the Metal-Binding Domain of Bleomycin*, 1990, vol. 29.
- 7 D. S. Marlin, M. M. Olmstead and P. K. Mascharak, *Eur J Inorg Chem*, 2002, 859–865.
- 8 R. F. Carina, L. Verzeognassi, G. Bernardinelli and A. F. Williams, *Chemical Communications*, 1998, 2681–2682.
- 9 Paul V. Bernhardt, Peter Comba, Trevor W. Hamble and Geoffrey A. Lawrance, *J inorg Chem*, 1991, **30**, 942–946.
- 10 Karl Wiegardt, Wilfried Schmidt, Willy Herrmann and Heinz-Josef Kuppers, *J Inorg Chem*.
- 11 K. Wiegardt, E. Schoffmann, B. Nuber and J. Weiss, *Inorg. Chem*, 1986, **25**, 4877–4883.
- 12 B. Philip George, G. I. H Hanania and D. H. Irvine, *Journal of chemical society*, 1959, 2548–2554.
- 13 J. Shearer, H. L. Jackson, D. Schweitzer, D. K. Rittenberg, T. M. Leavy, W. Kaminsky, R. C. Scarrow and J. A. Kovacs, *J Am Chem Soc*, 2002, **124**, 11417–11428.

### Cartesian Coordinates of all complexes considered in this work

**1** [Fe(phen)<sub>3</sub>]<sup>3+</sup> doublet

|    |              |              |              |
|----|--------------|--------------|--------------|
| 26 | -0.000100000 | 0.000100000  | 0.000300000  |
| 6  | 3.005900000  | -1.530600000 | 2.728100000  |
| 6  | 3.180700000  | -2.816700000 | 2.243500000  |
| 6  | 2.424900000  | -3.247200000 | 1.127000000  |
| 6  | 1.520600000  | -2.315800000 | 0.565400000  |
| 6  | 2.082400000  | -0.670700000 | 2.108500000  |
| 6  | 2.518700000  | -4.556300000 | 0.539700000  |
| 6  | 0.731900000  | -2.671900000 | -0.564700000 |
| 6  | 0.833100000  | -3.966100000 | -1.126600000 |
| 6  | 1.753500000  | -4.901800000 | -0.539700000 |
| 6  | 0.010500000  | -4.248400000 | -2.243300000 |
| 1  | 0.048400000  | -5.227700000 | -2.713500000 |

|   |              |              |              |
|---|--------------|--------------|--------------|
| 6 | -0.838900000 | -3.267000000 | -2.727700000 |
| 6 | -0.873700000 | -2.005800000 | -2.107900000 |
| 1 | 3.211800000  | -5.272500000 | 0.971500000  |
| 1 | 3.570100000  | -1.171500000 | 3.582800000  |
| 1 | 3.890600000  | -3.492400000 | 2.713400000  |
| 1 | 1.930700000  | 0.336600000  | 2.478700000  |
| 1 | 1.832900000  | -5.895300000 | -0.971800000 |
| 1 | -1.481200000 | -3.452700000 | -3.582600000 |
| 1 | -1.529200000 | -1.226000000 | -2.478000000 |
| 7 | -0.105300000 | -1.707100000 | -1.054200000 |
| 7 | 1.350000000  | -1.049800000 | 1.055000000  |
| 6 | -0.177400000 | 3.369600000  | 2.726800000  |
| 6 | 0.849400000  | 4.163500000  | 2.242500000  |
| 6 | 1.600300000  | 3.723800000  | 1.126200000  |
| 6 | 1.245500000  | 2.474900000  | 0.564700000  |
| 6 | -0.460600000 | 2.139900000  | 2.107500000  |
| 6 | 2.687600000  | 4.459000000  | 0.539100000  |
| 6 | 1.948300000  | 1.969600000  | -0.565200000 |
| 6 | 3.019000000  | 2.703800000  | -1.126900000 |
| 6 | 3.369500000  | 3.968700000  | -0.539900000 |
| 6 | 3.674700000  | 2.132200000  | -2.243400000 |
| 1 | 4.504200000  | 2.654300000  | -2.713400000 |
| 6 | 3.249200000  | 0.905900000  | -2.727600000 |
| 6 | 2.174100000  | 0.245600000  | -2.107900000 |
| 1 | 2.961600000  | 5.417300000  | 0.971000000  |
| 1 | -0.770700000 | 3.679000000  | 3.581300000  |
| 1 | 1.079900000  | 5.116200000  | 2.712300000  |
| 1 | -1.257400000 | 1.505200000  | 2.477500000  |
| 1 | 4.190600000  | 4.533700000  | -0.971900000 |
| 1 | 3.731300000  | 0.442200000  | -3.582300000 |
| 1 | 1.826400000  | -0.712000000 | -2.477800000 |
| 7 | 1.531000000  | 0.762300000  | -1.054600000 |
| 7 | 0.234100000  | 1.694700000  | 1.054300000  |
| 6 | -2.828800000 | -1.836700000 | 2.728800000  |
| 6 | -4.030000000 | -1.345400000 | 2.244000000  |
| 6 | -4.025000000 | -0.476100000 | 1.127000000  |
| 6 | -2.766200000 | -0.158800000 | 0.565300000  |
| 6 | -1.622400000 | -1.467000000 | 2.109100000  |
| 6 | -5.205500000 | 0.096900000  | 0.539500000  |
| 6 | -2.680300000 | 0.701900000  | -0.565200000 |
| 6 | -3.851700000 | 1.261000000  | -1.127300000 |
| 6 | -5.122300000 | 0.931900000  | -0.540200000 |
| 6 | -3.684900000 | 2.114200000  | -2.244200000 |
| 1 | -4.552000000 | 2.570900000  | -2.714500000 |
| 6 | -2.410300000 | 2.359300000  | -2.728500000 |
| 6 | -1.300600000 | 1.759200000  | -2.108400000 |
| 1 | -6.172400000 | -0.145100000 | 0.971500000  |
| 1 | -2.799800000 | -2.504400000 | 3.583900000  |
| 1 | -4.970100000 | -1.622100000 | 2.714100000  |
| 1 | -0.674100000 | -1.839000000 | 2.479600000  |
| 1 | -6.022300000 | 1.359700000  | -0.972400000 |
| 1 | -2.250000000 | 3.008400000  | -3.583400000 |

|   |              |              |              |
|---|--------------|--------------|--------------|
| 1 | -0.297500000 | 1.937000000  | -2.478500000 |
| 7 | -1.426100000 | 0.944300000  | -1.054800000 |
| 7 | -1.584500000 | -0.643800000 | 1.055100000  |

**1 [Fe(phen)<sub>3</sub>]<sup>2+</sup> Singlet**

|    |              |              |              |
|----|--------------|--------------|--------------|
| 26 | 0.000700000  | -0.000900000 | -0.000400000 |
| 6  | 3.177300000  | 1.086000000  | 2.778300000  |
| 6  | 4.238900000  | 0.350700000  | 2.282600000  |
| 6  | 4.039300000  | -0.467200000 | 1.146800000  |
| 6  | 2.743500000  | -0.479100000 | 0.577700000  |
| 6  | 1.921800000  | 1.004700000  | 2.148100000  |
| 6  | 5.065700000  | -1.277500000 | 0.549600000  |
| 6  | 2.474000000  | -1.280600000 | -0.575900000 |
| 6  | 3.498700000  | -2.074200000 | -1.144300000 |
| 6  | 4.805800000  | -2.050000000 | -0.546500000 |
| 6  | 3.163300000  | -2.846500000 | -2.280100000 |
| 1  | 3.914600000  | -3.474000000 | -2.752100000 |
| 6  | 1.873400000  | -2.789900000 | -2.776400000 |
| 6  | 0.922600000  | -1.965400000 | -2.146900000 |
| 1  | 6.058700000  | -1.266100000 | 0.989900000  |
| 1  | 3.293600000  | 1.725000000  | 3.647600000  |
| 1  | 5.216500000  | 0.395800000  | 2.755100000  |
| 1  | 1.077800000  | 1.569400000  | 2.528300000  |
| 1  | 5.589900000  | -2.659900000 | -0.986200000 |
| 1  | 1.579900000  | -3.369300000 | -3.645700000 |
| 1  | -0.090900000 | -1.904400000 | -2.527400000 |
| 7  | 1.203600000  | -1.221700000 | -1.074300000 |
| 7  | 1.696100000  | 0.242500000  | 1.075400000  |
| 6  | -2.533600000 | 2.206600000  | 2.774300000  |
| 6  | -2.426700000 | 3.493700000  | 2.279100000  |
| 6  | -1.616400000 | 3.729900000  | 1.144800000  |
| 6  | -0.957400000 | 2.613700000  | 0.576600000  |
| 6  | -1.834400000 | 1.160000000  | 2.145200000  |
| 6  | -1.426600000 | 5.024000000  | 0.548400000  |
| 6  | -0.126500000 | 2.781200000  | -0.575500000 |
| 6  | 0.049800000  | 4.065600000  | -1.143100000 |
| 6  | -0.625600000 | 5.185400000  | -0.546200000 |
| 6  | 0.888600000  | 4.161700000  | -2.277200000 |
| 1  | 1.057500000  | 5.126200000  | -2.748400000 |
| 6  | 1.485000000  | 3.016300000  | -2.773000000 |
| 6  | 1.244700000  | 1.780400000  | -2.144500000 |
| 1  | -1.933700000 | 5.878400000  | 0.987900000  |
| 1  | -3.146700000 | 1.987800000  | 3.642600000  |
| 1  | -2.955200000 | 4.317800000  | 2.750800000  |
| 1  | -1.902300000 | 0.146700000  | 2.525100000  |
| 1  | -0.488400000 | 6.169600000  | -0.985300000 |
| 1  | 2.135100000  | 3.052000000  | -3.641100000 |
| 1  | 1.698900000  | 0.872200000  | -2.524900000 |
| 7  | 0.458300000  | 1.651700000  | -1.073300000 |
| 7  | -1.059700000 | 1.345700000  | 1.073900000  |
| 6  | -0.650500000 | -3.298200000 | 2.774100000  |

|   |              |              |              |
|---|--------------|--------------|--------------|
| 6 | -1.819500000 | -3.847100000 | 2.278600000  |
| 6 | -2.427400000 | -3.263000000 | 1.143600000  |
| 6 | -1.787700000 | -2.135700000 | 0.575100000  |
| 6 | -0.091100000 | -2.170800000 | 2.144800000  |
| 6 | -3.643500000 | -3.743700000 | 0.546600000  |
| 6 | -2.346000000 | -1.499700000 | -0.577900000 |
| 6 | -3.546800000 | -1.987500000 | -1.146400000 |
| 6 | -4.181600000 | -3.130600000 | -0.549000000 |
| 6 | -4.046600000 | -1.309500000 | -2.281800000 |
| 1 | -4.966500000 | -1.644200000 | -2.753800000 |
| 6 | -3.350200000 | -0.222100000 | -2.778000000 |
| 6 | -2.159900000 | 0.186200000  | -2.148500000 |
| 1 | -4.132000000 | -4.608700000 | 0.986500000  |
| 1 | -0.155700000 | -3.720400000 | 3.642800000  |
| 1 | -2.270900000 | -4.715600000 | 2.750700000  |
| 1 | 0.821000000  | -1.724500000 | 2.525000000  |
| 1 | -5.102800000 | -3.502400000 | -0.988600000 |
| 1 | -3.704100000 | 0.322700000  | -3.647100000 |
| 1 | -1.598400000 | 1.032300000  | -2.528900000 |
| 7 | -1.657600000 | -0.430200000 | -1.076000000 |
| 7 | -0.637800000 | -1.592200000 | 1.072900000  |

## 2 [Fe(bpy)<sub>3</sub>]<sup>3+</sup> Doublet

|    |              |              |              |
|----|--------------|--------------|--------------|
| 26 | -0.000300000 | -0.000100000 | 0.000100000  |
| 6  | -2.280100000 | -2.425100000 | 2.729300000  |
| 6  | -3.582500000 | -2.220700000 | 2.270600000  |
| 6  | -3.790300000 | -1.372900000 | 1.182200000  |
| 6  | -2.698100000 | -0.747100000 | 0.576100000  |
| 6  | -1.232300000 | -1.777700000 | 2.081200000  |
| 6  | -2.794700000 | 0.164300000  | -0.576300000 |
| 6  | -3.993800000 | 0.547000000  | -1.182500000 |
| 6  | -3.968400000 | 1.419500000  | -2.271000000 |
| 1  | -4.894500000 | 1.723400000  | -2.750500000 |
| 6  | -2.737800000 | 1.892400000  | -2.729600000 |
| 6  | -1.577500000 | 1.479200000  | -2.081400000 |
| 1  | -2.071000000 | -3.074100000 | 3.573600000  |
| 1  | -4.424300000 | -2.712100000 | 2.750000000  |
| 1  | -0.209700000 | -1.911200000 | 2.411100000  |
| 1  | -2.669400000 | 2.570800000  | -3.574000000 |
| 1  | -0.605700000 | 1.824200000  | -2.411300000 |
| 7  | -1.596800000 | 0.632400000  | -1.031400000 |
| 7  | -1.428700000 | -0.953500000 | 1.031300000  |
| 6  | 3.240700000  | -0.760100000 | 2.729100000  |
| 6  | 3.715500000  | -1.989900000 | 2.270500000  |
| 6  | 3.085100000  | -2.594300000 | 1.182300000  |
| 6  | 1.996500000  | -1.962000000 | 0.576400000  |
| 6  | 2.155500000  | -0.177000000 | 2.081300000  |
| 6  | 1.255400000  | -2.502100000 | -0.575400000 |
| 6  | 1.523900000  | -3.732100000 | -1.181200000 |
| 6  | 0.755000000  | -4.147600000 | -2.268800000 |
| 1  | 0.955200000  | -5.101700000 | -2.747900000 |

|   |              |              |              |
|---|--------------|--------------|--------------|
| 6 | -0.271000000 | -3.319400000 | -2.726900000 |
| 6 | -0.493600000 | -2.107700000 | -2.079300000 |
| 1 | 3.698100000  | -0.254100000 | 3.573300000  |
| 1 | 4.562400000  | -2.472700000 | 2.749700000  |
| 1 | 1.759400000  | 0.775100000  | 2.411300000  |
| 1 | -0.893300000 | -3.600400000 | -3.570500000 |
| 1 | -1.279100000 | -1.439400000 | -2.409000000 |
| 7 | 0.250200000  | -1.699700000 | -1.030300000 |
| 7 | 1.540100000  | -0.759600000 | 1.031500000  |
| 6 | -0.961900000 | 3.188700000  | 2.726900000  |
| 6 | -0.132900000 | 4.213900000  | 2.268500000  |
| 6 | 0.706000000  | 3.969100000  | 1.180900000  |
| 6 | 0.701800000  | 2.710100000  | 0.575300000  |
| 6 | -0.925100000 | 1.957200000  | 2.079400000  |
| 6 | 1.540100000  | 2.337400000  | -0.576400000 |
| 6 | 2.471800000  | 3.184000000  | -1.182200000 |
| 6 | 3.215200000  | 2.725300000  | -2.270100000 |
| 1 | 3.941900000  | 3.375000000  | -2.749400000 |
| 6 | 3.009300000  | 1.423000000  | -2.728500000 |
| 6 | 2.070700000  | 0.625200000  | -2.080700000 |
| 1 | -1.629200000 | 3.332700000  | 3.570600000  |
| 1 | -0.137600000 | 5.188800000  | 2.747500000  |
| 1 | -1.552600000 | 1.138800000  | 2.409200000  |
| 1 | 3.563000000  | 1.024200000  | -3.572500000 |
| 1 | 1.883500000  | -0.389000000 | -2.410500000 |
| 7 | 1.346400000  | 1.065800000  | -1.031200000 |
| 7 | -0.112400000 | 1.714400000  | 1.030300000  |
| 1 | -4.942200000 | 0.173300000  | -0.813500000 |
| 1 | -4.795900000 | -1.206400000 | 0.813100000  |
| 1 | 3.444100000  | -3.548300000 | 0.813300000  |
| 1 | 2.322500000  | -4.365700000 | -0.812500000 |
| 1 | 2.622300000  | 4.192200000  | -0.813500000 |
| 1 | 1.353600000  | 4.756300000  | 0.812000000  |

## 2 [Fe(bpy)<sub>3</sub>]<sup>2+</sup> Singlet

|    |              |              |              |
|----|--------------|--------------|--------------|
| 26 | 0.000400000  | 0.000300000  | 0.000200000  |
| 6  | 1.689200000  | 2.863900000  | 2.762900000  |
| 6  | 2.994200000  | 2.987400000  | 2.286200000  |
| 6  | 3.379000000  | 2.227300000  | 1.183700000  |
| 6  | 2.456400000  | 1.364000000  | 0.583200000  |
| 6  | 0.821800000  | 1.987800000  | 2.115900000  |
| 6  | 2.761800000  | 0.514400000  | -0.584700000 |
| 6  | 4.022800000  | 0.436800000  | -1.185600000 |
| 6  | 4.209900000  | -0.393600000 | -2.288600000 |
| 1  | 5.183600000  | -0.463500000 | -2.763900000 |
| 6  | 3.125100000  | -1.129200000 | -2.765500000 |
| 6  | 1.898600000  | -1.006900000 | -2.117900000 |
| 1  | 1.341400000  | 3.433200000  | 3.618800000  |
| 1  | 3.700200000  | 3.661800000  | 2.761200000  |
| 1  | -0.198200000 | 1.864700000  | 2.459400000  |
| 1  | 3.219300000  | -1.789000000 | -3.621900000 |

|   |              |              |              |
|---|--------------|--------------|--------------|
| 1 | 1.033900000  | -1.561700000 | -2.461600000 |
| 7 | 1.706200000  | -0.206900000 | -1.051900000 |
| 7 | 1.183300000  | 1.247900000  | 1.050400000  |
| 6 | -3.321700000 | 0.027700000  | 2.765800000  |
| 6 | -4.083000000 | 1.094700000  | 2.289200000  |
| 6 | -3.618900000 | 1.808500000  | 1.186300000  |
| 6 | -2.409600000 | 1.443000000  | 0.585300000  |
| 6 | -2.129100000 | -0.283900000 | 2.118100000  |
| 6 | -1.827700000 | 2.133700000  | -0.582400000 |
| 6 | -2.392400000 | 3.264300000  | -1.182400000 |
| 6 | -1.767200000 | 3.843600000  | -2.284600000 |
| 1 | -2.194500000 | 4.721600000  | -2.759200000 |
| 6 | -0.586500000 | 3.274200000  | -2.761400000 |
| 6 | -0.077900000 | 2.150900000  | -2.114800000 |
| 1 | -3.639300000 | -0.558300000 | 3.622200000  |
| 1 | -5.020200000 | 1.367600000  | 2.764600000  |
| 1 | -1.510900000 | -1.104600000 | 2.461400000  |
| 1 | -0.062400000 | 3.687400000  | -3.617000000 |
| 1 | 0.835700000  | 1.681000000  | -2.458600000 |
| 7 | -0.674200000 | 1.582400000  | -1.049700000 |
| 7 | -1.670900000 | 0.399500000  | 1.052100000  |
| 6 | 1.640200000  | -2.895400000 | 2.759400000  |
| 6 | 1.094000000  | -4.087000000 | 2.282800000  |
| 6 | 0.241400000  | -4.039700000 | 1.181800000  |
| 6 | -0.046200000 | -2.808600000 | 0.582700000  |
| 6 | 1.314000000  | -1.705800000 | 2.113600000  |
| 6 | -0.936700000 | -2.647800000 | -0.583600000 |
| 6 | -1.636000000 | -3.700700000 | -1.183300000 |
| 6 | -2.450300000 | -3.447200000 | -2.285100000 |
| 1 | -2.998900000 | -4.255200000 | -2.759500000 |
| 6 | -2.544800000 | -2.139900000 | -2.762100000 |
| 6 | -1.824000000 | -1.139200000 | -2.115500000 |
| 1 | 2.308500000  | -2.879300000 | 3.614200000  |
| 1 | 1.326100000  | -5.036000000 | 2.756700000  |
| 1 | 1.718000000  | -0.761100000 | 2.457100000  |
| 1 | -3.164200000 | -1.891300000 | -3.617600000 |
| 1 | -1.871800000 | -0.113000000 | -2.459200000 |
| 7 | -1.033700000 | -1.373000000 | -1.050600000 |
| 7 | 0.490800000  | -1.648300000 | 1.049500000  |
| 1 | 4.854600000  | 1.013700000  | -0.798400000 |
| 1 | 4.387800000  | 2.312100000  | 0.796800000  |
| 1 | -4.198200000 | 2.638900000  | 0.799500000  |
| 1 | -3.308800000 | 3.694400000  | -0.795300000 |
| 1 | -1.552300000 | -4.709600000 | -0.796200000 |
| 1 | -0.190000000 | -4.955600000 | 0.795000000  |

### 3 [Fe(Py<sub>2</sub>Py)<sub>2</sub>]<sup>3+</sup> Doublet

|    |              |              |              |
|----|--------------|--------------|--------------|
| 26 | -0.001800000 | -0.011100000 | -0.012400000 |
| 7  | -0.455500000 | -1.381100000 | -1.380500000 |
| 7  | -1.924000000 | 0.061500000  | 0.048800000  |
| 7  | -0.246100000 | 1.397900000  | 1.383500000  |

|   |              |              |              |
|---|--------------|--------------|--------------|
| 7 | 0.362600000  | 1.337700000  | -1.432600000 |
| 7 | 1.924400000  | -0.051000000 | -0.036200000 |
| 7 | 0.338500000  | -1.430700000 | 1.344300000  |
| 6 | 0.351100000  | -2.234600000 | -2.289900000 |
| 6 | -0.663500000 | -3.233700000 | -2.896200000 |
| 6 | -2.047900000 | -2.582000000 | -2.639700000 |
| 6 | -1.729500000 | -1.569700000 | -1.581400000 |
| 6 | -2.632500000 | -0.744900000 | -0.762700000 |
| 6 | -4.032500000 | -0.715000000 | -0.740100000 |
| 6 | -4.662300000 | 0.169200000  | 0.144400000  |
| 6 | -3.901500000 | 1.000100000  | 0.981700000  |
| 6 | -2.508100000 | 0.919700000  | 0.906600000  |
| 6 | -1.489500000 | 1.673700000  | 1.662100000  |
| 6 | -1.670600000 | 2.703400000  | 2.735200000  |
| 6 | -0.232600000 | 3.259700000  | 2.902900000  |
| 6 | 0.671200000  | 2.193800000  | 2.238600000  |
| 6 | -0.494300000 | 2.152700000  | -2.332100000 |
| 6 | 0.471800000  | 3.176400000  | -2.974800000 |
| 6 | 1.881200000  | 2.568100000  | -2.752200000 |
| 6 | 1.624400000  | 1.561600000  | -1.672400000 |
| 6 | 2.579300000  | 0.769000000  | -0.879000000 |
| 6 | 3.978200000  | 0.770900000  | -0.916700000 |
| 6 | 4.667100000  | -0.098000000 | -0.059500000 |
| 6 | 3.963200000  | -0.946500000 | 0.806400000  |
| 6 | 2.564900000  | -0.896800000 | 0.792100000  |
| 6 | 1.596600000  | -1.681300000 | 1.577600000  |
| 6 | 1.836200000  | -2.766000000 | 2.583100000  |
| 6 | 0.420200000  | -2.978400000 | 3.179400000  |
| 6 | -0.531800000 | -2.327600000 | 2.147800000  |
| 1 | 1.156000000  | -2.715100000 | -1.726900000 |
| 1 | 0.812900000  | -1.584000000 | -3.043100000 |
| 1 | -0.599700000 | -4.198200000 | -2.384800000 |
| 1 | -0.478200000 | -3.411200000 | -3.957200000 |
| 1 | -2.449800000 | -2.070800000 | -3.527200000 |
| 1 | -2.814400000 | -3.296200000 | -2.319100000 |
| 1 | -4.615900000 | -1.359600000 | -1.390600000 |
| 1 | -5.747000000 | 0.213000000  | 0.183300000  |
| 1 | -4.386300000 | 1.686900000  | 1.668900000  |
| 1 | -2.049300000 | 2.217200000  | 3.646900000  |
| 1 | -2.407200000 | 3.467500000  | 2.462700000  |
| 1 | 0.029600000  | 3.423700000  | 3.949700000  |
| 1 | -0.135900000 | 4.217700000  | 2.384500000  |
| 1 | 1.470000000  | 2.619200000  | 1.625000000  |
| 1 | 1.132700000  | 1.512600000  | 2.964300000  |
| 1 | -1.300000000 | 2.614200000  | -1.754900000 |
| 1 | -0.952000000 | 1.478000000  | -3.066300000 |
| 1 | 0.393600000  | 4.142500000  | -2.468500000 |
| 1 | 0.251700000  | 3.339400000  | -4.031400000 |
| 1 | 2.270600000  | 2.055900000  | -3.644800000 |
| 1 | 2.636900000  | 3.307600000  | -2.464600000 |
| 1 | 4.518100000  | 1.425700000  | -1.594200000 |
| 1 | 5.753200000  | -0.117200000 | -0.069100000 |



|   |              |              |             |
|---|--------------|--------------|-------------|
| 1 | 4.491600000  | -1.626200000 | 1.468100000 |
| 1 | 2.588700000  | -2.487300000 | 3.329200000 |
| 1 | 2.221700000  | -3.660300000 | 2.070900000 |
| 1 | 0.337800000  | -2.472200000 | 4.145200000 |
| 1 | 0.190700000  | -4.033400000 | 3.339700000 |
| 1 | -0.985600000 | -3.057300000 | 1.465600000 |
| 1 | -1.339700000 | -1.748200000 | 2.602700000 |

### 3 [Fe(Py<sub>r</sub>Py)<sub>2</sub>]<sup>2+</sup> Singlet

|    |              |              |              |
|----|--------------|--------------|--------------|
| 26 | 0.000000000  | -0.006000000 | -0.006200000 |
| 7  | -0.371900000 | -1.409000000 | -1.397900000 |
| 7  | -1.922100000 | -0.011400000 | -0.012300000 |
| 7  | -0.387600000 | 1.394700000  | 1.381900000  |
| 7  | 0.380900000  | 1.392700000  | -1.399000000 |
| 7  | 1.922100000  | -0.004200000 | -0.002800000 |
| 7  | 0.378600000  | -1.395200000 | 1.396700000  |
| 6  | 0.474100000  | -2.238400000 | -2.281900000 |
| 6  | -0.484800000 | -3.273000000 | -2.917800000 |
| 6  | -1.894300000 | -2.664100000 | -2.703300000 |
| 6  | -1.627400000 | -1.640800000 | -1.634300000 |
| 6  | -2.578800000 | -0.846700000 | -0.845700000 |
| 6  | -3.976200000 | -0.875100000 | -0.875200000 |
| 6  | -4.679500000 | -0.019200000 | -0.020000000 |
| 6  | -3.985900000 | 0.840700000  | 0.839200000  |
| 6  | -2.588100000 | 0.820200000  | 0.817600000  |
| 6  | -1.645400000 | 1.619800000  | 1.611300000  |
| 6  | -1.923200000 | 2.642000000  | 2.678700000  |
| 6  | -0.518100000 | 3.258800000  | 2.899600000  |
| 6  | 0.449600000  | 2.228900000  | 2.269300000  |
| 6  | -0.459900000 | 2.225700000  | -2.284200000 |
| 6  | 0.503700000  | 3.259700000  | -2.914100000 |
| 6  | 1.911000000  | 2.647000000  | -2.695700000 |
| 6  | 1.637700000  | 1.622600000  | -1.629300000 |
| 6  | 2.584200000  | 0.826400000  | -0.836800000 |
| 6  | 3.981800000  | 0.846000000  | -0.866100000 |
| 6  | 4.679500000  | -0.013800000 | -0.010100000 |
| 6  | 3.980400000  | -0.867800000 | 0.850500000  |
| 6  | 2.582800000  | -0.837400000 | 0.829600000  |
| 6  | 1.635100000  | -1.628300000 | 1.626000000  |
| 6  | 1.906600000  | -2.697500000 | 2.647900000  |
| 6  | 0.498700000  | -2.916000000 | 3.259100000  |
| 6  | -0.463500000 | -2.283000000 | 2.225800000  |
| 1  | 1.281500000  | -2.691300000 | -1.698800000 |
| 1  | 0.939100000  | -1.576600000 | -3.024200000 |
| 1  | -0.406200000 | -4.232200000 | -2.397300000 |
| 1  | -0.262000000 | -3.452100000 | -3.971700000 |
| 1  | -2.283300000 | -2.169700000 | -3.604800000 |
| 1  | -2.644100000 | -3.403300000 | -2.401400000 |
| 1  | -4.502700000 | -1.546300000 | -1.546200000 |
| 1  | -5.765100000 | -0.022200000 | -0.023000000 |
| 1  | -4.519900000 | 1.508900000  | 1.507300000  |

|   |              |              |              |
|---|--------------|--------------|--------------|
| 1 | -2.313400000 | 2.145700000  | 3.578500000  |
| 1 | -2.675600000 | 3.376900000  | 2.373100000  |
| 1 | -0.301500000 | 3.439900000  | 3.954400000  |
| 1 | -0.442200000 | 4.217900000  | 2.378400000  |
| 1 | 1.257000000  | 2.685700000  | 1.689500000  |
| 1 | 0.914200000  | 1.569600000  | 3.014100000  |
| 1 | -1.268100000 | 2.679100000  | -1.702500000 |
| 1 | -0.923800000 | 1.566800000  | -3.029700000 |
| 1 | 0.425400000  | 4.217700000  | -2.391400000 |
| 1 | 0.285300000  | 3.441800000  | -3.968400000 |
| 1 | 2.302000000  | 2.153300000  | -3.596700000 |
| 1 | 2.661400000  | 3.384000000  | -2.389800000 |
| 1 | 4.512600000  | 1.512900000  | -1.538000000 |
| 1 | 5.765100000  | -0.018200000 | -0.013700000 |
| 1 | 4.510000000  | -1.538900000 | 1.519100000  |
| 1 | 2.657000000  | -2.394500000 | 3.386000000  |
| 1 | 2.296600000  | -3.597700000 | 2.152000000  |
| 1 | 0.420200000  | -2.395400000 | 4.218300000  |
| 1 | 0.279100000  | -3.970500000 | 3.438700000  |
| 1 | -0.925500000 | -3.026300000 | 1.563100000  |
| 1 | -1.272900000 | -1.703600000 | 2.679700000  |

#### 4 [Fe(Pyep)<sub>2</sub>]<sup>1+</sup> Doublet

|    |              |              |              |
|----|--------------|--------------|--------------|
| 26 | 0.177000000  | -0.000100000 | 0.000100000  |
| 6  | -1.709200000 | 1.941300000  | -0.809600000 |
| 7  | -1.295600000 | 1.326100000  | 0.319500000  |
| 6  | -1.914000000 | 1.599400000  | 1.481600000  |
| 6  | -2.975300000 | 2.499500000  | 1.554000000  |
| 6  | -3.414100000 | 3.129000000  | 0.387000000  |
| 6  | -2.768700000 | 2.844500000  | -0.816200000 |
| 7  | 0.102100000  | 0.764400000  | -1.793100000 |
| 6  | -0.933600000 | 1.602500000  | -2.052800000 |
| 8  | -1.234100000 | 2.102600000  | -3.143000000 |
| 7  | 1.574300000  | -1.319300000 | -0.576700000 |
| 6  | 1.813700000  | -2.518900000 | -0.057800000 |
| 7  | 2.769400000  | -3.147100000 | -0.774400000 |
| 6  | 3.158300000  | -2.314900000 | -1.805600000 |
| 6  | 2.408700000  | -1.173000000 | -1.677700000 |
| 6  | 2.384400000  | 0.058200000  | -2.524700000 |
| 6  | 0.964900000  | 0.465100000  | -2.938600000 |
| 1  | -1.547600000 | 1.080500000  | 2.359300000  |
| 1  | -3.444900000 | 2.693300000  | 2.513000000  |
| 1  | -4.243600000 | 3.829700000  | 0.416400000  |
| 1  | -3.053100000 | 3.298100000  | -1.759900000 |
| 1  | 3.131600000  | -4.073000000 | -0.585300000 |
| 1  | 3.913100000  | -2.598600000 | -2.523200000 |
| 1  | 1.328600000  | -2.941800000 | 0.807900000  |
| 1  | 0.521400000  | -0.339900000 | -3.546400000 |
| 1  | 1.009800000  | 1.344700000  | -3.590100000 |
| 1  | 2.975600000  | -0.120000000 | -3.429600000 |
| 1  | 2.866300000  | 0.888100000  | -1.992700000 |

|   |              |              |              |
|---|--------------|--------------|--------------|
| 7 | -1.296000000 | -1.325700000 | -0.319800000 |
| 7 | 0.101300000  | -0.764600000 | 1.793100000  |
| 7 | 1.574900000  | 1.318600000  | 0.576800000  |
| 6 | -1.710300000 | -1.940700000 | 0.809200000  |
| 6 | -2.770000000 | -2.843600000 | 0.815400000  |
| 6 | -3.414800000 | -3.128200000 | -0.388000000 |
| 6 | -2.975400000 | -2.498900000 | -1.554900000 |
| 6 | -1.914000000 | -1.599000000 | -1.482100000 |
| 1 | -3.055000000 | -3.297000000 | 1.759000000  |
| 1 | -4.244500000 | -3.828700000 | -0.417700000 |
| 1 | -3.444600000 | -2.692800000 | -2.514100000 |
| 1 | -1.547000000 | -1.080300000 | -2.359700000 |
| 6 | -0.935100000 | -1.601800000 | 2.052700000  |
| 8 | -1.236400000 | -2.101300000 | 3.142900000  |
| 6 | 0.963600000  | -0.465200000 | 2.938900000  |
| 6 | 2.383500000  | -0.058900000 | 2.525400000  |
| 6 | 2.408500000  | 1.172200000  | 1.678400000  |
| 6 | 3.158300000  | 2.314000000  | 1.806500000  |
| 7 | 2.770300000  | 3.146100000  | 0.775000000  |
| 6 | 1.814800000  | 2.518000000  | 0.058000000  |
| 1 | 3.912800000  | 2.597500000  | 2.524600000  |
| 1 | 1.330200000  | 2.941100000  | -0.807900000 |
| 1 | 3.132800000  | 4.071900000  | 0.586100000  |
| 1 | 0.520100000  | 0.340300000  | 3.546100000  |
| 1 | 1.007900000  | -1.344600000 | 3.590800000  |
| 1 | 2.974400000  | 0.119100000  | 3.430500000  |
| 1 | 2.865200000  | -0.889000000 | 1.993600000  |

#### 4 [Fe(Pyep)<sub>2</sub>] Quintet

|    |              |              |              |
|----|--------------|--------------|--------------|
| 26 | -0.005800000 | -0.138700000 | 0.005100000  |
| 6  | 2.230200000  | 1.611900000  | -1.037800000 |
| 7  | 1.488800000  | 1.525700000  | 0.082700000  |
| 6  | 1.679300000  | 2.421900000  | 1.061600000  |
| 6  | 2.617800000  | 3.448800000  | 0.967000000  |
| 6  | 3.391900000  | 3.539900000  | -0.193300000 |
| 6  | 3.199900000  | 2.604300000  | -1.208700000 |
| 7  | 0.912200000  | -0.201800000 | -1.902600000 |
| 6  | 1.995300000  | 0.566300000  | -2.112600000 |
| 8  | 2.811700000  | 0.502600000  | -3.058200000 |
| 7  | -1.402600000 | -1.753700000 | -0.731900000 |
| 6  | -2.226100000 | -2.494600000 | -0.014100000 |
| 7  | -2.892900000 | -3.375700000 | -0.804700000 |
| 6  | -2.464900000 | -3.177700000 | -2.105000000 |
| 6  | -1.541700000 | -2.159800000 | -2.049700000 |
| 6  | -0.797600000 | -1.504600000 | -3.176100000 |
| 6  | 0.692700000  | -1.234600000 | -2.912500000 |
| 1  | 1.052500000  | 2.303300000  | 1.942100000  |
| 1  | 2.735100000  | 4.154300000  | 1.784400000  |
| 1  | 4.133800000  | 4.327300000  | -0.301600000 |
| 1  | 3.773500000  | 2.611500000  | -2.129200000 |
| 1  | -3.578800000 | -4.050400000 | -0.496000000 |

|   |              |              |              |
|---|--------------|--------------|--------------|
| 1 | -2.848800000 | -3.758200000 | -2.930800000 |
| 1 | -2.371600000 | -2.417300000 | 1.053600000  |
| 1 | 1.168800000  | -0.935000000 | -3.853800000 |
| 1 | 1.175200000  | -2.179600000 | -2.607000000 |
| 1 | -1.280500000 | -0.549700000 | -3.428800000 |
| 1 | -0.887700000 | -2.142300000 | -4.065100000 |
| 7 | -1.659900000 | 1.332700000  | -0.250900000 |
| 7 | -0.772300000 | 0.066200000  | 1.966400000  |
| 7 | 1.483900000  | -1.602900000 | 0.856800000  |
| 6 | -2.315800000 | 1.577300000  | 0.899600000  |
| 6 | -3.413000000 | 2.442200000  | 0.954100000  |
| 6 | -3.838500000 | 3.067800000  | -0.216600000 |
| 6 | -3.148700000 | 2.818300000  | -1.406300000 |
| 6 | -2.064000000 | 1.943000000  | -1.374100000 |
| 1 | -3.892900000 | 2.602600000  | 1.913300000  |
| 1 | -4.689100000 | 3.744700000  | -0.202700000 |
| 1 | -3.437800000 | 3.291800000  | -2.340100000 |
| 1 | -1.486900000 | 1.720400000  | -2.268300000 |
| 6 | -1.801200000 | 0.911000000  | 2.164600000  |
| 8 | -2.351200000 | 1.212200000  | 3.245300000  |
| 6 | -0.216700000 | -0.508600000 | 3.191100000  |
| 6 | 0.255600000  | -1.964900000 | 3.028800000  |
| 6 | 1.438500000  | -2.152300000 | 2.127400000  |
| 6 | 2.603800000  | -2.846500000 | 2.353600000  |
| 7 | 3.354300000  | -2.714900000 | 1.198600000  |
| 6 | 2.640900000  | -1.955700000 | 0.326400000  |
| 1 | 2.956500000  | -3.405400000 | 3.207700000  |
| 1 | 2.994000000  | -1.681300000 | -0.657700000 |
| 1 | 4.273600000  | -3.100600000 | 1.033700000  |
| 1 | 0.636700000  | 0.097900000  | 3.539600000  |
| 1 | -0.968800000 | -0.470400000 | 3.988100000  |
| 1 | 0.509800000  | -2.359500000 | 4.021100000  |
| 1 | -0.586800000 | -2.568600000 | 2.662100000  |

### 5 [Fe(Prpep)<sub>2</sub>]<sup>1+</sup> Doublet

|    |              |              |              |
|----|--------------|--------------|--------------|
| 26 | 0.175500000  | -0.084500000 | 0.000600000  |
| 6  | -2.165400000 | -1.422100000 | 0.855100000  |
| 7  | -1.600300000 | -0.974900000 | -0.287300000 |
| 6  | -2.302600000 | -1.106000000 | -1.427700000 |
| 7  | -3.516200000 | -1.638600000 | -1.517300000 |
| 6  | -4.081800000 | -2.069300000 | -0.379700000 |
| 6  | -3.433900000 | -1.987000000 | 0.853100000  |
| 7  | -0.122900000 | -0.708300000 | 1.813700000  |
| 6  | -1.304300000 | -1.321800000 | 2.086400000  |
| 8  | -1.675100000 | -1.826100000 | 3.149800000  |
| 7  | 1.829900000  | 0.936000000  | 0.578800000  |
| 6  | 2.639100000  | 1.634300000  | -0.213000000 |
| 7  | 3.584100000  | 2.257000000  | 0.520200000  |
| 6  | 3.370600000  | 1.956000000  | 1.848300000  |

|   |              |              |              |
|---|--------------|--------------|--------------|
| 6 | 2.267400000  | 1.141100000  | 1.886100000  |
| 6 | 1.558200000  | 0.601000000  | 3.091000000  |
| 6 | 0.899800000  | -0.759100000 | 2.858300000  |
| 1 | -1.836300000 | -0.748500000 | -2.338400000 |
| 1 | -5.078300000 | -2.494900000 | -0.468700000 |
| 1 | -3.867900000 | -2.344200000 | 1.780700000  |
| 1 | 4.322600000  | 2.842600000  | 0.151100000  |
| 1 | 3.995900000  | 2.345200000  | 2.637500000  |
| 1 | 2.553900000  | 1.721500000  | -1.283100000 |
| 1 | 0.436200000  | -1.105700000 | 3.786300000  |
| 1 | 1.676200000  | -1.489200000 | 2.582400000  |
| 1 | 0.794200000  | 1.316900000  | 3.424100000  |
| 1 | 2.275700000  | 0.513800000  | 3.914900000  |
| 7 | -0.880700000 | 1.614800000  | 0.161800000  |
| 7 | 0.346500000  | 0.521000000  | -1.855300000 |
| 7 | 1.183500000  | -1.777100000 | -0.414800000 |
| 6 | -1.000500000 | 2.280700000  | -1.006500000 |
| 6 | -1.712800000 | 3.471100000  | -1.079500000 |
| 6 | -2.280300000 | 3.937800000  | 0.105900000  |
| 7 | -2.158600000 | 3.278200000  | 1.268300000  |
| 6 | -1.469300000 | 2.143200000  | 1.249700000  |
| 1 | -1.804600000 | 3.986900000  | -2.029200000 |
| 1 | -2.850100000 | 4.863300000  | 0.135300000  |
| 1 | -1.368700000 | 1.592100000  | 2.177900000  |
| 6 | -0.332500000 | 1.645900000  | -2.196600000 |
| 8 | -0.425200000 | 2.164600000  | -3.313200000 |
| 6 | 1.012500000  | -0.161300000 | -2.970400000 |
| 6 | 2.258400000  | -0.948500000 | -2.549900000 |
| 6 | 1.975400000  | -2.007900000 | -1.534500000 |
| 6 | 2.392800000  | -3.314000000 | -1.508700000 |
| 7 | 1.850500000  | -3.868200000 | -0.368000000 |
| 6 | 1.127900000  | -2.920800000 | 0.263100000  |
| 1 | 3.012500000  | -3.879200000 | -2.188300000 |
| 1 | 0.586600000  | -3.093700000 | 1.179400000  |
| 1 | 1.966700000  | -4.823400000 | -0.053600000 |
| 1 | 0.305100000  | -0.849100000 | -3.460400000 |
| 1 | 1.285400000  | 0.581600000  | -3.727300000 |
| 1 | 2.684100000  | -1.420400000 | -3.442300000 |
| 1 | 3.028400000  | -0.265500000 | -2.170700000 |

### 5 [Fe(Prpep)<sub>2</sub>] Singlet

|    |              |              |              |
|----|--------------|--------------|--------------|
| 26 | -0.003400000 | -0.136700000 | 0.005700000  |
| 6  | 2.252000000  | 1.594500000  | -1.040000000 |
| 7  | 1.524100000  | 1.514400000  | 0.090000000  |
| 6  | 1.775800000  | 2.408000000  | 1.056100000  |
| 7  | 2.685100000  | 3.382500000  | 1.008100000  |
| 6  | 3.407300000  | 3.457300000  | -0.121900000 |
| 6  | 3.233400000  | 2.575000000  | -1.184900000 |
| 7  | 0.894700000  | -0.177900000 | -1.914300000 |
| 6  | 1.989700000  | 0.569500000  | -2.127500000 |
| 8  | 2.799200000  | 0.509600000  | -3.077200000 |

|   |              |              |              |
|---|--------------|--------------|--------------|
| 7 | -1.421600000 | -1.721800000 | -0.729000000 |
| 6 | -2.234600000 | -2.475700000 | -0.011500000 |
| 7 | -2.922500000 | -3.333200000 | -0.808800000 |
| 6 | -2.520800000 | -3.107000000 | -2.112500000 |
| 6 | -1.590300000 | -2.096400000 | -2.053200000 |
| 6 | -0.864000000 | -1.422500000 | -3.179900000 |
| 6 | 0.635800000  | -1.182200000 | -2.945200000 |
| 1 | 1.178500000  | 2.323600000  | 1.960300000  |
| 1 | 4.148700000  | 4.252900000  | -0.165400000 |
| 1 | 3.819500000  | 2.620000000  | -2.095900000 |
| 1 | -3.607000000 | -4.010400000 | -0.502100000 |
| 1 | -2.926000000 | -3.664600000 | -2.943700000 |
| 1 | -2.357100000 | -2.425200000 | 1.060600000  |
| 1 | 1.095200000  | -0.865000000 | -3.888700000 |
| 1 | 1.112400000  | -2.140000000 | -2.673900000 |
| 1 | -1.338600000 | -0.455500000 | -3.398800000 |
| 1 | -0.983400000 | -2.036100000 | -4.082000000 |
| 7 | -1.654300000 | 1.361400000  | -0.235400000 |
| 7 | -0.748300000 | 0.087100000  | 1.973700000  |
| 7 | 1.468400000  | -1.619300000 | 0.834900000  |
| 6 | -2.301200000 | 1.590900000  | 0.923500000  |
| 6 | -3.398200000 | 2.451700000  | 0.964200000  |
| 6 | -3.782900000 | 3.045900000  | -0.234700000 |
| 7 | -3.137600000 | 2.826000000  | -1.392100000 |
| 6 | -2.099000000 | 1.992100000  | -1.330300000 |
| 1 | -3.902700000 | 2.633400000  | 1.906300000  |
| 1 | -4.631400000 | 3.725800000  | -0.280200000 |
| 1 | -1.553300000 | 1.803600000  | -2.251200000 |
| 6 | -1.783500000 | 0.919100000  | 2.184100000  |
| 8 | -2.342100000 | 1.209900000  | 3.261200000  |
| 6 | -0.179500000 | -0.492700000 | 3.191400000  |
| 6 | 0.265000000  | -1.957000000 | 3.027000000  |
| 6 | 1.428800000  | -2.168800000 | 2.106100000  |
| 6 | 2.580100000  | -2.891200000 | 2.313700000  |
| 7 | 3.315500000  | -2.777400000 | 1.147800000  |
| 6 | 2.608700000  | -2.000600000 | 0.286800000  |
| 1 | 2.932000000  | -3.458700000 | 3.162400000  |
| 1 | 2.953500000  | -1.736200000 | -0.702900000 |
| 1 | 4.222800000  | -3.185200000 | 0.969200000  |
| 1 | 0.689400000  | 0.102700000  | 3.517700000  |
| 1 | -0.916100000 | -0.437700000 | 4.001200000  |
| 1 | 0.530000000  | -2.351000000 | 4.016400000  |
| 1 | -0.594200000 | -2.548300000 | 2.679400000  |

**6 [Fe(PyepO)<sub>2</sub>]<sup>1-</sup> Sextet**

|    |              |              |              |
|----|--------------|--------------|--------------|
| 26 | 0.000000000  | 0.000000000  | 0.520900000  |
| 7  | 0.000000000  | 2.080600000  | 0.196400000  |
| 7  | 1.535500000  | 0.379400000  | -1.103200000 |
| 8  | -1.406600000 | 0.545400000  | 1.744800000  |
| 6  | -1.712900000 | 1.835200000  | 1.787300000  |
| 6  | 2.306800000  | -0.540600000 | -1.696300000 |

|   |              |              |              |
|---|--------------|--------------|--------------|
| 6 | 3.300300000  | -0.198800000 | -2.614400000 |
| 6 | 3.490900000  | 1.152200000  | -2.917800000 |
| 6 | 2.689800000  | 2.107800000  | -2.296400000 |
| 6 | 1.718000000  | 1.683000000  | -1.384300000 |
| 1 | 2.116800000  | -1.572900000 | -1.416700000 |
| 1 | 3.905800000  | -0.975900000 | -3.071600000 |
| 1 | 4.257200000  | 1.454300000  | -3.628500000 |
| 1 | 2.786500000  | 3.171300000  | -2.485600000 |
| 6 | -2.734800000 | 2.339300000  | 2.610700000  |
| 6 | -3.016900000 | 3.708700000  | 2.626200000  |
| 6 | -2.286500000 | 4.592200000  | 1.822400000  |
| 6 | -1.263700000 | 4.113100000  | 0.992200000  |
| 6 | -0.967500000 | 2.740700000  | 0.964300000  |
| 1 | -3.288100000 | 1.638900000  | 3.231600000  |
| 1 | -3.808800000 | 4.086500000  | 3.271300000  |
| 1 | -2.506100000 | 5.657900000  | 1.840400000  |
| 1 | -0.687000000 | 4.785200000  | 0.368600000  |
| 6 | 0.823100000  | 2.681100000  | -0.679400000 |
| 8 | 0.928900000  | 3.890400000  | -0.972500000 |
| 7 | 0.000000000  | -2.080600000 | 0.196400000  |
| 7 | -1.535500000 | -0.379400000 | -1.103200000 |
| 8 | 1.406600000  | -0.545400000 | 1.744800000  |
| 6 | 1.712900000  | -1.835200000 | 1.787300000  |
| 6 | 2.734800000  | -2.339300000 | 2.610700000  |
| 6 | 3.016900000  | -3.708700000 | 2.626200000  |
| 6 | 2.286500000  | -4.592200000 | 1.822400000  |
| 6 | 1.263700000  | -4.113100000 | 0.992200000  |
| 6 | 0.967500000  | -2.740700000 | 0.964300000  |
| 1 | 3.288100000  | -1.638900000 | 3.231600000  |
| 1 | 3.808800000  | -4.086500000 | 3.271300000  |
| 1 | 2.506100000  | -5.657900000 | 1.840400000  |
| 1 | 0.687000000  | -4.785200000 | 0.368600000  |
| 6 | -2.306800000 | 0.540600000  | -1.696300000 |
| 6 | -3.300300000 | 0.198800000  | -2.614400000 |
| 6 | -3.490900000 | -1.152200000 | -2.917800000 |
| 6 | -2.689800000 | -2.107800000 | -2.296400000 |
| 6 | -1.718000000 | -1.683000000 | -1.384300000 |
| 1 | -2.116800000 | 1.572900000  | -1.416700000 |
| 1 | -3.905800000 | 0.975900000  | -3.071600000 |
| 1 | -4.257200000 | -1.454300000 | -3.628500000 |
| 1 | -2.786500000 | -3.171300000 | -2.485600000 |
| 6 | -0.823100000 | -2.681100000 | -0.679400000 |
| 8 | -0.928900000 | -3.890400000 | -0.972500000 |

**6 [Fe(PyepO)<sub>2</sub>]<sup>2-</sup> Quintet**

|    |              |              |              |
|----|--------------|--------------|--------------|
| 26 | 0.000000000  | 0.000000000  | 0.533200000  |
| 7  | 0.000000000  | 2.164000000  | 0.154400000  |
| 7  | 1.544600000  | 0.394700000  | -1.065700000 |
| 8  | -1.450400000 | 0.719900000  | 1.823600000  |
| 6  | -1.663200000 | 2.005800000  | 1.832100000  |
| 6  | 2.339100000  | -0.531000000 | -1.621800000 |
| 6  | 3.323600000  | -0.217900000 | -2.560900000 |
| 6  | 3.482100000  | 1.120200000  | -2.939000000 |
| 6  | 2.659700000  | 2.084700000  | -2.358700000 |

|   |              |              |              |
|---|--------------|--------------|--------------|
| 6 | 1.700800000  | 1.689700000  | -1.415500000 |
| 1 | 2.169500000  | -1.553100000 | -1.293200000 |
| 1 | 3.944400000  | -1.006900000 | -2.979000000 |
| 1 | 4.237100000  | 1.403900000  | -3.671300000 |
| 1 | 2.729000000  | 3.140600000  | -2.598800000 |
| 6 | -2.621000000 | 2.613400000  | 2.684300000  |
| 6 | -2.838700000 | 3.995100000  | 2.669700000  |
| 6 | -2.109400000 | 4.821000000  | 1.804300000  |
| 6 | -1.150600000 | 4.254700000  | 0.945900000  |
| 6 | -0.912500000 | 2.869800000  | 0.942500000  |
| 1 | -3.181300000 | 1.962700000  | 3.354300000  |
| 1 | -3.583800000 | 4.428700000  | 3.339900000  |
| 1 | -2.278000000 | 5.898000000  | 1.792300000  |
| 1 | -0.571900000 | 4.874000000  | 0.270100000  |
| 6 | 0.813900000  | 2.718600000  | -0.746300000 |
| 8 | 0.943300000  | 3.924700000  | -1.097000000 |
| 7 | 0.000000000  | -2.164000000 | 0.154400000  |
| 7 | -1.544600000 | -0.394700000 | -1.065700000 |
| 8 | 1.450400000  | -0.719900000 | 1.823600000  |
| 6 | 1.663200000  | -2.005800000 | 1.832100000  |
| 6 | 2.621000000  | -2.613400000 | 2.684300000  |
| 6 | 2.838700000  | -3.995100000 | 2.669700000  |
| 6 | 2.109400000  | -4.821000000 | 1.804300000  |
| 6 | 1.150600000  | -4.254700000 | 0.945900000  |
| 6 | 0.912500000  | -2.869800000 | 0.942500000  |
| 1 | 3.181300000  | -1.962700000 | 3.354300000  |
| 1 | 3.583800000  | -4.428700000 | 3.339900000  |
| 1 | 2.278000000  | -5.898000000 | 1.792300000  |
| 1 | 0.571900000  | -4.874000000 | 0.270100000  |
| 6 | -2.339100000 | 0.531000000  | -1.621800000 |
| 6 | -3.323600000 | 0.217900000  | -2.560900000 |
| 6 | -3.482100000 | -1.120200000 | -2.939000000 |
| 6 | -2.659700000 | -2.084700000 | -2.358700000 |
| 6 | -1.700800000 | -1.689700000 | -1.415500000 |
| 1 | -2.169500000 | 1.553100000  | -1.293200000 |
| 1 | -3.944400000 | 1.006900000  | -2.979000000 |
| 1 | -4.237100000 | -1.403900000 | -3.671300000 |
| 1 | -2.729000000 | -3.140600000 | -2.598800000 |
| 6 | -0.813900000 | -2.718600000 | -0.746300000 |
| 8 | -0.943300000 | -3.924700000 | -1.097000000 |

7 [Fe(PyIm<sub>2</sub>H<sub>2</sub>)<sub>2</sub>]<sup>1-</sup> Doublet

|    |              |              |              |
|----|--------------|--------------|--------------|
| 26 | 0.000000000  | 0.000200000  | 0.000100000  |
| 7  | -1.763100000 | -2.553000000 | -2.555100000 |
| 7  | -0.316800000 | -1.380700000 | -1.382200000 |
| 7  | -1.949400000 | -0.000100000 | -0.000200000 |
| 7  | -0.317800000 | 1.380800000  | 1.382300000  |
| 7  | -1.764700000 | 2.552600000  | 2.554900000  |
| 7  | 0.317200000  | -1.382300000 | 1.380700000  |
| 7  | 1.763700000  | -2.555600000 | 2.552300000  |
| 7  | 1.949400000  | 0.000200000  | 0.000200000  |



|   |              |              |              |
|---|--------------|--------------|--------------|
| 7 | 0.317400000  | 1.382500000  | -1.380500000 |
| 7 | 1.764100000  | 2.555600000  | -2.552200000 |
| 6 | -1.630200000 | -1.602900000 | -1.604400000 |
| 6 | 0.386700000  | -2.214600000 | -2.217000000 |
| 6 | -0.508000000 | -2.952700000 | -2.955500000 |
| 6 | -2.602500000 | -0.835700000 | -0.836500000 |
| 6 | -2.603100000 | 0.835300000  | 0.835700000  |
| 6 | -4.000600000 | 0.860500000  | 0.860800000  |
| 6 | -4.691200000 | -0.000500000 | -0.000800000 |
| 6 | -4.000000000 | -0.861300000 | -0.862100000 |
| 6 | -1.631300000 | 1.602700000  | 1.604000000  |
| 6 | -0.509800000 | 2.952400000  | 2.955900000  |
| 6 | 0.385300000  | 2.214700000  | 2.217400000  |
| 6 | 1.630600000  | -1.604500000 | 1.602500000  |
| 6 | 0.508700000  | -2.955900000 | 2.952300000  |
| 6 | -0.386100000 | -2.217200000 | 2.214600000  |
| 6 | 2.602700000  | -0.836300000 | 0.835400000  |
| 6 | 2.602900000  | 0.836700000  | -0.834800000 |
| 6 | 4.000400000  | 0.862200000  | -0.860000000 |
| 6 | 4.691200000  | 0.000300000  | 0.000600000  |
| 6 | 4.000200000  | -0.861700000 | 0.860900000  |
| 6 | 1.630900000  | 1.604800000  | -1.602200000 |
| 6 | -0.385800000 | 2.217100000  | -2.214800000 |
| 6 | 0.509100000  | 2.955700000  | -2.952500000 |
| 1 | -4.545500000 | 1.524100000  | 1.524800000  |
| 1 | -5.777400000 | -0.000700000 | -0.001000000 |
| 1 | -4.544400000 | -1.525100000 | -1.526400000 |
| 1 | 1.464400000  | 2.242200000  | 2.245200000  |
| 1 | -0.361100000 | 3.709000000  | 3.713500000  |
| 1 | 1.465800000  | -2.241800000 | -2.244500000 |
| 1 | -0.358900000 | -3.709500000 | -3.712800000 |
| 1 | 4.545100000  | 1.526700000  | -1.523200000 |
| 1 | 5.777400000  | 0.000300000  | 0.000700000  |
| 1 | 4.544800000  | -1.526100000 | 1.524300000  |
| 1 | -1.464900000 | 2.244500000  | -2.242500000 |
| 1 | 0.360200000  | 3.713100000  | -3.709400000 |
| 1 | -1.465200000 | -2.244600000 | 2.242200000  |
| 1 | 0.359800000  | -3.713500000 | 3.708900000  |
| 1 | -2.633200000 | -2.923700000 | -2.925900000 |
| 1 | -2.635100000 | 2.923000000  | 2.925500000  |
| 1 | 2.634000000  | -2.926400000 | 2.922700000  |
| 1 | 2.634300000  | 2.926500000  | -2.922500000 |

### 7 [Fe(PyIm<sub>2</sub>H<sub>2</sub>)<sub>2</sub>]<sup>2-</sup> Quintet

|    |              |              |              |
|----|--------------|--------------|--------------|
| 26 | 0.000000000  | 0.001700000  | 0.000500000  |
| 7  | 2.236100000  | 2.589800000  | -2.556700000 |
| 7  | 0.608600000  | 1.548600000  | -1.488400000 |
| 7  | 2.179100000  | 0.000300000  | 0.002400000  |
| 7  | 0.604300000  | -1.545300000 | 1.491300000  |
| 7  | 2.228800000  | -2.588700000 | 2.562000000  |
| 7  | -0.610300000 | 1.556600000  | 1.481000000  |

|   |              |              |              |
|---|--------------|--------------|--------------|
| 7 | -2.239600000 | 2.601800000  | 2.542600000  |
| 7 | -2.178700000 | -0.001300000 | -0.002600000 |
| 7 | -0.602200000 | -1.554600000 | -1.482500000 |
| 7 | -2.226000000 | -2.604300000 | -2.548300000 |
| 6 | 1.935100000  | 1.656400000  | -1.614600000 |
| 6 | 0.055800000  | 2.437000000  | -2.376200000 |
| 6 | 1.056600000  | 3.095500000  | -3.052100000 |
| 6 | 2.844900000  | 0.837900000  | -0.813700000 |
| 6 | 2.842600000  | -0.838100000 | 0.819500000  |
| 6 | 4.241600000  | -0.870300000 | 0.847500000  |
| 6 | 4.938500000  | -0.001400000 | 0.004500000  |
| 6 | 4.244100000  | 0.868300000  | -0.839500000 |
| 6 | 1.930500000  | -1.655200000 | 1.619300000  |
| 6 | 1.047800000  | -3.092500000 | 3.056000000  |
| 6 | 0.049000000  | -2.432600000 | 2.378600000  |
| 6 | -1.937000000 | 1.663900000  | 1.605600000  |
| 6 | -1.060900000 | 3.111200000  | 3.036300000  |
| 6 | -0.059100000 | 2.450100000  | 2.364500000  |
| 6 | -2.845700000 | 0.840300000  | 0.808500000  |
| 6 | -2.841200000 | -0.844600000 | -0.815600000 |
| 6 | -4.240200000 | -0.877800000 | -0.844200000 |
| 6 | -4.938200000 | -0.004800000 | -0.006500000 |
| 6 | -4.244800000 | 0.870000000  | 0.833300000  |
| 6 | -1.928300000 | -1.665600000 | -1.610400000 |
| 6 | -0.046400000 | -2.446700000 | -2.364700000 |
| 6 | -1.044700000 | -3.110500000 | -3.039000000 |
| 1 | 4.782500000  | -1.547200000 | 1.501100000  |
| 1 | 6.024300000  | -0.002100000 | 0.005300000  |
| 1 | 4.786800000  | 1.544600000  | -1.492300000 |
| 1 | -1.020100000 | -2.549300000 | 2.480600000  |
| 1 | 1.022100000  | -3.853600000 | 3.821800000  |
| 1 | -1.013000000 | 2.555300000  | -2.479700000 |
| 1 | 1.033000000  | 3.856800000  | -3.817700000 |
| 1 | -4.780200000 | -1.558600000 | -1.494500000 |
| 1 | -6.024000000 | -0.006200000 | -0.008000000 |
| 1 | -4.788400000 | 1.549500000  | 1.481900000  |
| 1 | 1.022800000  | -2.563600000 | -2.465700000 |
| 1 | -1.018400000 | -3.875700000 | -3.800600000 |
| 1 | 1.009600000  | 2.570000000  | 2.468100000  |
| 1 | -1.038600000 | 3.876600000  | 3.797900000  |
| 1 | 3.161000000  | 2.873800000  | -2.856400000 |
| 1 | 3.152900000  | -2.873900000 | 2.863200000  |
| 1 | -3.165000000 | 2.886400000  | 2.840300000  |
| 1 | -3.149900000 | -2.891400000 | -2.848300000 |

### 8 [Fe(sar)]<sup>3+</sup> Doublet

|    |              |              |              |
|----|--------------|--------------|--------------|
| 26 | 0.000000000  | 0.000000000  | 0.000000000  |
| 7  | 1.162400000  | 1.515600000  | 0.755600000  |
| 7  | 1.162400000  | -1.411900000 | 0.934500000  |
| 7  | -1.162300000 | -0.103600000 | 1.689800000  |
| 7  | -1.162400000 | 1.515600000  | -0.755700000 |

|   |              |              |              |
|---|--------------|--------------|--------------|
| 7 | -1.162400000 | -1.412000000 | -0.934300000 |
| 7 | 1.162300000  | -0.103700000 | -1.689800000 |
| 6 | 0.755000000  | 2.790100000  | 0.066000000  |
| 6 | 2.665700000  | 1.287200000  | 0.728200000  |
| 6 | 3.076600000  | 0.000400000  | 0.000000000  |
| 6 | 2.665700000  | -1.273700000 | 0.750300000  |
| 6 | 0.754800000  | -1.452800000 | 2.382900000  |
| 6 | -0.755300000 | -1.338200000 | 2.448700000  |
| 6 | -2.665600000 | -0.012500000 | 1.478400000  |
| 6 | -3.076600000 | 0.000400000  | 0.000000000  |
| 6 | -2.665700000 | 1.287200000  | -0.728300000 |
| 6 | -2.665700000 | -1.273800000 | -0.750300000 |
| 6 | -0.755000000 | 2.790100000  | -0.066200000 |
| 6 | 2.665600000  | -0.012700000 | -1.478400000 |
| 6 | 0.755300000  | -1.338400000 | -2.448600000 |
| 6 | -0.754800000 | -1.453000000 | -2.382800000 |
| 1 | -4.175800000 | 0.000400000  | 0.000000000  |
| 1 | 4.175800000  | 0.000400000  | 0.000000000  |
| 1 | 3.026900000  | 1.264600000  | 1.760600000  |
| 1 | 3.132800000  | 2.152500000  | 0.248800000  |
| 1 | 3.027000000  | -2.156400000 | 0.214500000  |
| 1 | 3.132800000  | -1.291200000 | 1.739500000  |
| 1 | 3.026500000  | 0.892800000  | -1.975300000 |
| 1 | 3.132900000  | -0.860500000 | -1.988000000 |
| 1 | -3.026900000 | 1.264400000  | -1.760700000 |
| 1 | -3.132800000 | 2.152500000  | -0.249000000 |
| 1 | -3.026500000 | 0.892900000  | 1.975200000  |
| 1 | -3.132900000 | -0.860300000 | 1.988100000  |
| 1 | -3.132800000 | -1.291400000 | -1.739400000 |
| 1 | -3.027000000 | -2.156400000 | -0.214300000 |
| 1 | -1.109600000 | -2.375400000 | -2.856300000 |
| 1 | -1.239100000 | -0.616800000 | -2.898100000 |
| 1 | 1.110500000  | -1.288200000 | -3.484100000 |
| 1 | 1.239600000  | -2.202200000 | -1.980900000 |
| 1 | -1.110100000 | 3.661700000  | -0.627600000 |
| 1 | -1.239300000 | 2.817300000  | 0.915700000  |
| 1 | 1.110100000  | 3.661800000  | 0.627300000  |
| 1 | 1.239300000  | 2.817200000  | -0.915900000 |
| 1 | -1.110500000 | -1.287900000 | 3.484200000  |
| 1 | -1.239600000 | -2.202100000 | 1.981100000  |
| 1 | 1.109600000  | -2.375200000 | 2.856500000  |
| 1 | 1.239100000  | -0.616600000 | 2.898200000  |
| 1 | -0.920200000 | 1.645400000  | -1.740500000 |
| 1 | 0.919600000  | 0.684000000  | -2.294800000 |
| 1 | 0.920200000  | 1.645600000  | 1.740300000  |
| 1 | -0.919600000 | 0.684200000  | 2.294700000  |
| 1 | 0.920200000  | -2.329500000 | 0.554200000  |
| 1 | -0.920200000 | -2.329600000 | -0.554100000 |

**8 [Fe(sar)]<sup>2+</sup> Singlet**

|    |             |             |             |
|----|-------------|-------------|-------------|
| 26 | 0.000200000 | 0.000100000 | 0.000000000 |
|----|-------------|-------------|-------------|

|   |              |              |              |
|---|--------------|--------------|--------------|
| 7 | 1.184000000  | 1.693700000  | 0.172300000  |
| 7 | 1.184300000  | -0.996200000 | 1.380400000  |
| 7 | -1.183700000 | 0.479900000  | 1.632900000  |
| 7 | -1.183900000 | 1.174300000  | -1.232100000 |
| 7 | -1.184000000 | -1.654400000 | -0.400700000 |
| 7 | 1.184100000  | -0.697700000 | -1.553000000 |
| 6 | 0.757400000  | 2.629500000  | -0.913100000 |
| 6 | 2.674600000  | 1.468000000  | 0.200600000  |
| 6 | 3.080700000  | 0.000200000  | -0.000200000 |
| 6 | 2.674900000  | -0.907600000 | 1.170800000  |
| 6 | 0.757800000  | -0.523900000 | 2.733400000  |
| 6 | -0.758200000 | -0.416600000 | 2.751200000  |
| 6 | -2.674300000 | 0.467800000  | 1.405800000  |
| 6 | -3.080800000 | 0.000100000  | 0.000100000  |
| 6 | -2.674600000 | 0.983400000  | -1.108000000 |
| 6 | -2.674700000 | -1.451300000 | -0.297700000 |
| 6 | -0.758500000 | 2.591100000  | -1.014800000 |
| 6 | 2.674800000  | -0.560200000 | -1.371700000 |
| 6 | 0.757600000  | -2.105700000 | -1.820000000 |
| 6 | -0.758400000 | -2.174700000 | -1.736200000 |
| 1 | -4.180600000 | 0.000200000  | 0.000300000  |
| 1 | 4.180500000  | 0.000300000  | -0.000200000 |
| 1 | 3.065700000  | 1.824700000  | 1.159200000  |
| 1 | 3.142400000  | 2.086300000  | -0.573100000 |
| 1 | 3.066100000  | -1.916100000 | 1.000400000  |
| 1 | 3.142700000  | -0.546600000 | 2.093100000  |
| 1 | 3.065700000  | 0.091600000  | -2.160000000 |
| 1 | 3.142800000  | -1.539400000 | -1.520200000 |
| 1 | -3.064300000 | 0.629200000  | -2.068100000 |
| 1 | -3.143400000 | 1.956200000  | -0.924400000 |
| 1 | -3.064200000 | 1.476300000  | 1.579400000  |
| 1 | -3.143100000 | -0.177900000 | 2.156200000  |
| 1 | -3.143600000 | -1.778300000 | -1.232000000 |
| 1 | -3.064800000 | -2.105800000 | 0.489000000  |
| 1 | -1.117400000 | -3.197500000 | -1.904100000 |
| 1 | -1.213300000 | -1.542400000 | -2.507000000 |
| 1 | 1.116000000  | -2.458200000 | -2.795000000 |
| 1 | 1.212600000  | -2.748100000 | -1.057700000 |
| 1 | -1.117700000 | 3.247800000  | -1.816800000 |
| 1 | -1.213700000 | 2.942300000  | -0.082000000 |
| 1 | 1.115500000  | 3.650100000  | -0.730000000 |
| 1 | 1.212500000  | 2.291300000  | -1.850800000 |
| 1 | -1.117100000 | -0.050500000 | 3.721000000  |
| 1 | -1.213200000 | -1.400200000 | 2.589100000  |
| 1 | 1.116100000  | -1.192400000 | 3.525900000  |
| 1 | 1.212800000  | 0.457400000  | 2.908800000  |
| 1 | -0.952300000 | 0.966400000  | -2.205200000 |
| 1 | 0.953600000  | -0.177600000 | -2.401600000 |
| 1 | 0.953300000  | 2.168000000  | 1.047300000  |
| 1 | -0.952200000 | 1.426500000  | 1.939500000  |
| 1 | 0.953600000  | -1.991000000 | 1.353600000  |
| 1 | -0.952600000 | -2.393200000 | 0.266000000  |

9 [Fe(diammac)]<sup>3+</sup> Doublet

|    |              |              |              |
|----|--------------|--------------|--------------|
| 26 | 0.000000000  | 0.000000000  | 0.054000000  |
| 6  | -1.607300000 | -3.915800000 | -0.071300000 |
| 6  | -0.711800000 | -2.673700000 | -0.058700000 |
| 6  | 0.235700000  | -2.666000000 | 1.168600000  |
| 7  | 0.614900000  | -1.243700000 | 1.529800000  |
| 6  | 0.000000000  | -0.759700000 | 2.823400000  |
| 6  | 0.000000000  | 0.759700000  | 2.823400000  |
| 7  | -0.614900000 | 1.243700000  | 1.529800000  |
| 6  | -0.235700000 | 2.666000000  | 1.168600000  |
| 6  | 0.711800000  | 2.673700000  | -0.058700000 |
| 6  | 1.607300000  | 3.915800000  | -0.071300000 |
| 7  | 1.497200000  | 1.377000000  | 0.052500000  |
| 7  | 0.737300000  | -1.171200000 | -1.422300000 |
| 6  | 0.635400000  | -0.419800000 | -2.730000000 |
| 6  | -0.635400000 | 0.419800000  | -2.730000000 |
| 7  | -0.737300000 | 1.171200000  | -1.422300000 |
| 6  | -0.040300000 | 2.511700000  | -1.391000000 |
| 7  | -1.497200000 | -1.377000000 | 0.052500000  |
| 6  | 0.040300000  | -2.511700000 | -1.391000000 |
| 1  | 1.733400000  | -1.346000000 | -1.263600000 |
| 1  | 1.631000000  | -1.210300000 | 1.652700000  |
| 1  | -1.631000000 | 1.210300000  | 1.652700000  |
| 1  | -1.733400000 | 1.346000000  | -1.263600000 |
| 1  | -2.089700000 | -1.403200000 | 0.888900000  |
| 1  | -2.166000000 | -1.327500000 | -0.723500000 |
| 1  | 2.089700000  | 1.403200000  | 0.888900000  |
| 1  | 2.166000000  | 1.327500000  | -0.723500000 |
| 1  | -0.671000000 | -2.552000000 | -2.222100000 |
| 1  | 0.763000000  | -3.318200000 | -1.546000000 |
| 1  | -0.250600000 | -3.131400000 | 2.031200000  |
| 1  | 1.139900000  | -3.246300000 | 0.964300000  |
| 1  | -1.019800000 | -1.151600000 | 2.883400000  |
| 1  | 0.547900000  | -1.159500000 | 3.683900000  |
| 1  | 1.019800000  | 1.151600000  | 2.883400000  |
| 1  | -0.547900000 | 1.159500000  | 3.683900000  |
| 1  | -1.139900000 | 3.246300000  | 0.964300000  |
| 1  | 0.250600000  | 3.131400000  | 2.031200000  |
| 1  | 0.671000000  | 2.552000000  | -2.222100000 |
| 1  | -0.763000000 | 3.318200000  | -1.546000000 |
| 1  | -0.650300000 | 1.113500000  | -3.577700000 |
| 1  | -1.527000000 | -0.208900000 | -2.820200000 |
| 1  | 0.650300000  | -1.113500000 | -3.577700000 |
| 1  | 1.527000000  | 0.208900000  | -2.820200000 |
| 1  | -2.218800000 | -3.976400000 | 0.835800000  |
| 1  | -0.998900000 | -4.826300000 | -0.116500000 |
| 1  | -2.275000000 | -3.924200000 | -0.939800000 |
| 1  | 0.998900000  | 4.826300000  | -0.116500000 |
| 1  | 2.218800000  | 3.976400000  | 0.835800000  |
| 1  | 2.275000000  | 3.924200000  | -0.939800000 |

9 [Fe(diammac)]<sup>2+</sup> Singlet

|    |              |              |              |
|----|--------------|--------------|--------------|
| 26 | 0.000000000  | 0.000000000  | 0.055600000  |
| 6  | 0.495200000  | 4.208300000  | -0.068600000 |
| 6  | 0.000000000  | 2.758200000  | -0.055200000 |
| 6  | -0.923600000 | 2.504000000  | 1.168700000  |
| 7  | -0.939800000 | 1.047000000  | 1.541300000  |
| 6  | -0.198800000 | 0.735700000  | 2.808300000  |
| 6  | 0.198800000  | -0.735700000 | 2.808300000  |
| 7  | 0.939800000  | -1.047000000 | 1.541300000  |
| 6  | 0.923600000  | -2.504000000 | 1.168700000  |
| 6  | 0.000000000  | -2.758200000 | -0.055200000 |
| 6  | -0.495200000 | -4.208300000 | -0.068600000 |
| 7  | -1.108400000 | -1.747700000 | 0.059600000  |
| 7  | -1.028900000 | 0.948600000  | -1.434400000 |
| 6  | -0.721600000 | 0.250800000  | -2.724900000 |
| 6  | 0.721600000  | -0.250800000 | -2.724900000 |
| 7  | 1.028900000  | -0.948600000 | -1.434400000 |
| 6  | 0.681600000  | -2.406600000 | -1.393300000 |
| 7  | 1.108400000  | 1.747700000  | 0.059600000  |
| 6  | -0.681600000 | 2.406600000  | -1.393300000 |
| 1  | -2.035700000 | 0.870100000  | -1.290500000 |
| 1  | -1.912000000 | 0.770600000  | 1.685200000  |
| 1  | 1.912000000  | -0.770600000 | 1.685200000  |
| 1  | 2.035700000  | -0.870100000 | -1.290500000 |
| 1  | 1.664500000  | 1.942600000  | 0.896600000  |
| 1  | 1.765200000  | 1.891000000  | -0.712500000 |
| 1  | -1.664500000 | -1.942600000 | 0.896600000  |
| 1  | -1.765200000 | -1.891000000 | -0.712500000 |
| 1  | 0.010300000  | 2.627800000  | -2.213900000 |
| 1  | -1.571300000 | 3.024200000  | -1.554200000 |
| 1  | -0.584800000 | 3.099400000  | 2.023700000  |
| 1  | -1.941800000 | 2.834900000  | 0.942800000  |
| 1  | 0.694700000  | 1.367300000  | 2.845400000  |
| 1  | -0.796800000 | 0.979600000  | 3.694700000  |
| 1  | -0.694700000 | -1.367300000 | 2.845400000  |
| 1  | 0.796800000  | -0.979600000 | 3.694700000  |
| 1  | 1.941800000  | -2.834900000 | 0.942800000  |
| 1  | 0.584800000  | -3.099400000 | 2.023700000  |
| 1  | -0.010300000 | -2.627800000 | -2.213900000 |
| 1  | 1.571300000  | -3.024200000 | -1.554200000 |
| 1  | 0.899800000  | -0.899800000 | -3.590900000 |
| 1  | 1.417800000  | 0.590000000  | -2.812100000 |
| 1  | -0.899800000 | 0.899800000  | -3.590900000 |
| 1  | -1.417800000 | -0.590000000 | -2.812100000 |
| 1  | 1.067000000  | 4.438700000  | 0.837400000  |
| 1  | -0.345300000 | 4.910000000  | -0.114300000 |
| 1  | 1.136400000  | 4.404500000  | -0.935400000 |
| 1  | 0.345300000  | -4.910000000 | -0.114300000 |
| 1  | -1.067000000 | -4.438700000 | 0.837400000  |
| 1  | -1.136400000 | -4.404500000 | -0.935400000 |

**10 [Fe(tacn)<sub>2</sub>]<sup>3+</sup> Doublet**

|    |              |              |              |
|----|--------------|--------------|--------------|
| 26 | 0.000000000  | 0.076800000  | 0.000000000  |
| 7  | 1.354600000  | 0.042300000  | 1.534000000  |
| 7  | 1.337000000  | -1.290700000 | -0.746700000 |
| 7  | 1.251000000  | 1.434700000  | -0.845600000 |
| 7  | -1.337000000 | -1.290600000 | 0.746900000  |
| 7  | -1.354600000 | 0.042000000  | -1.534000000 |
| 7  | -1.251000000 | 1.434900000  | 0.845300000  |
| 6  | 1.847600000  | -1.374400000 | 1.725900000  |
| 6  | 1.826800000  | -2.159700000 | 0.388000000  |
| 6  | 2.473000000  | -0.620200000 | -1.496100000 |
| 6  | 2.042600000  | 0.768500000  | -1.940300000 |
| 6  | 2.062100000  | 2.070100000  | 0.257000000  |
| 6  | 2.489800000  | 1.020100000  | 1.273900000  |
| 6  | -1.847600000 | -1.374700000 | -1.725700000 |
| 6  | -1.826800000 | -2.159700000 | -0.387600000 |
| 6  | -2.473000000 | -0.619900000 | 1.496200000  |
| 6  | -2.042600000 | 0.768900000  | 1.940200000  |
| 6  | -2.062100000 | 2.070100000  | -0.257300000 |
| 6  | -2.489800000 | 1.019800000  | -1.274000000 |
| 1  | 1.392100000  | 0.714900000  | -2.819600000 |
| 1  | 2.907100000  | 1.380800000  | -2.221300000 |
| 1  | 2.933400000  | 2.590200000  | -0.157100000 |
| 1  | 1.430400000  | 2.834400000  | 0.721400000  |
| 1  | 3.352200000  | 0.453600000  | 0.923900000  |
| 1  | 2.788700000  | 1.493300000  | 2.214600000  |
| 1  | 2.848000000  | -1.349300000 | 2.167800000  |
| 1  | 1.201600000  | -1.858200000 | 2.463600000  |
| 1  | 2.813800000  | -2.560300000 | 0.139100000  |
| 1  | 1.158100000  | -3.020700000 | 0.466100000  |
| 1  | 3.341400000  | -0.580000000 | -0.838900000 |
| 1  | 2.762600000  | -1.231600000 | -2.356700000 |
| 1  | -2.813900000 | -2.560200000 | -0.138700000 |
| 1  | -1.158200000 | -3.020800000 | -0.465500000 |
| 1  | -3.341500000 | -0.579700000 | 0.839000000  |
| 1  | -2.762600000 | -1.231100000 | 2.356900000  |
| 1  | -2.907000000 | 1.381200000  | 2.221100000  |
| 1  | -1.392000000 | 0.715400000  | 2.819500000  |
| 1  | -2.933400000 | 2.590200000  | 0.156700000  |
| 1  | -1.430400000 | 2.834300000  | -0.721900000 |
| 1  | -3.352200000 | 0.453400000  | -0.923800000 |
| 1  | -2.788800000 | 1.492900000  | -2.214800000 |
| 1  | -2.847900000 | -1.349700000 | -2.167700000 |
| 1  | -1.201500000 | -1.858600000 | -2.463300000 |
| 1  | 0.922000000  | 0.318900000  | 2.417900000  |
| 1  | 0.745900000  | 2.203200000  | -1.294300000 |
| 1  | 0.882500000  | -1.918200000 | -1.412700000 |
| 1  | -0.745900000 | 2.203400000  | 1.293900000  |
| 1  | -0.882500000 | -1.918000000 | 1.413000000  |
| 1  | -0.922000000 | 0.318500000  | -2.417900000 |

**10 [Fe(tacn)<sub>2</sub>]<sup>2+</sup> Singlet**

|    |              |              |              |
|----|--------------|--------------|--------------|
| 26 | 0.000000000  | 0.000000000  | 0.000000000  |
| 7  | 0.786900000  | 1.375300000  | 1.341800000  |
| 7  | -1.584400000 | -0.006200000 | 1.341800000  |
| 7  | 0.797600000  | -1.369100000 | 1.341800000  |
| 7  | -0.786900000 | 1.375300000  | -1.341800000 |
| 7  | -0.797600000 | -1.369100000 | -1.341800000 |
| 7  | 1.584400000  | -0.006200000 | -1.341800000 |
| 6  | -0.231300000 | 1.779800000  | 2.376900000  |
| 6  | -1.635500000 | 1.361000000  | 1.942600000  |
| 6  | -1.425700000 | -1.090200000 | 2.376900000  |
| 6  | -0.360900000 | -2.096900000 | 1.942600000  |
| 6  | 1.657000000  | -0.689600000 | 2.376900000  |
| 6  | 1.996500000  | 0.735900000  | 1.942600000  |
| 6  | -1.657000000 | -0.689600000 | -2.376900000 |
| 6  | -1.996500000 | 0.735900000  | -1.942600000 |
| 6  | 0.231300000  | 1.779800000  | -2.376900000 |
| 6  | 1.635500000  | 1.361000000  | -1.942600000 |
| 6  | 1.425700000  | -1.090200000 | -2.376900000 |
| 6  | 0.360900000  | -2.096900000 | -1.942600000 |
| 1  | -0.753400000 | -2.774400000 | 1.177600000  |
| 1  | -0.054500000 | -2.718200000 | 2.794000000  |
| 1  | 1.117800000  | -0.682400000 | 3.327300000  |
| 1  | 2.574400000  | -1.260600000 | 2.550700000  |
| 1  | 2.381300000  | 1.311900000  | 2.794000000  |
| 1  | 2.779400000  | 0.734700000  | 1.177600000  |
| 1  | 0.032000000  | 1.309200000  | 3.327300000  |
| 1  | -0.195400000 | 2.859800000  | 2.550700000  |
| 1  | -2.326800000 | 1.406300000  | 2.794000000  |
| 1  | -2.026000000 | 2.039600000  | 1.177600000  |
| 1  | -1.149900000 | -0.626900000 | 3.327300000  |
| 1  | -2.378900000 | -1.599200000 | 2.550700000  |
| 1  | -2.381300000 | 1.311900000  | -2.794000000 |
| 1  | -2.779400000 | 0.734700000  | -1.177600000 |
| 1  | -0.032000000 | 1.309200000  | -3.327300000 |
| 1  | 0.195400000  | 2.859800000  | -2.550700000 |
| 1  | 2.326800000  | 1.406300000  | -2.794000000 |
| 1  | 2.026000000  | 2.039600000  | -1.177600000 |
| 1  | 1.149900000  | -0.626900000 | -3.327300000 |
| 1  | 2.378900000  | -1.599200000 | -2.550700000 |
| 1  | 0.054500000  | -2.718200000 | -2.794000000 |
| 1  | 0.753400000  | -2.774400000 | -1.177600000 |
| 1  | -1.117800000 | -0.682400000 | -3.327300000 |
| 1  | -2.574400000 | -1.260600000 | -2.550700000 |
| 1  | 1.102600000  | 2.228500000  | 0.880500000  |
| 1  | 1.378600000  | -2.069200000 | 0.880500000  |
| 1  | -2.481300000 | -0.159300000 | 0.880500000  |
| 1  | 2.481300000  | -0.159300000 | -0.880500000 |
| 1  | -1.102600000 | 2.228500000  | -0.880500000 |
| 1  | -1.378600000 | -2.069200000 | -0.880500000 |



**11 [Fe(EDTA)(H<sub>2</sub>O)]<sup>1-</sup> Sextet**

|    |              |              |              |
|----|--------------|--------------|--------------|
| 7  | -1.472900000 | -0.143200000 | 1.102300000  |
| 6  | -0.727700000 | 0.140200000  | 2.340300000  |
| 1  | -0.642300000 | 1.225800000  | 2.443300000  |
| 1  | -1.272200000 | -0.228900000 | 3.226500000  |
| 6  | 0.668000000  | -0.487500000 | 2.306100000  |
| 1  | 1.191000000  | -0.257600000 | 3.250800000  |
| 1  | 0.592500000  | -1.575800000 | 2.235800000  |
| 7  | 1.428200000  | -0.002900000 | 1.144400000  |
| 6  | -2.532100000 | 0.836700000  | 0.802800000  |
| 1  | -3.453000000 | 0.640600000  | 1.369900000  |
| 1  | -2.172400000 | 1.836500000  | 1.063000000  |
| 6  | -2.844700000 | 0.854300000  | -0.706900000 |
| 6  | -1.967200000 | -1.533400000 | 1.037400000  |
| 1  | -2.873000000 | -1.554000000 | 0.422600000  |
| 1  | -2.237900000 | -1.911600000 | 2.032900000  |
| 6  | -0.972600000 | -2.504600000 | 0.372600000  |
| 6  | 1.860200000  | 1.403800000  | 1.285600000  |
| 1  | 2.846100000  | 1.521700000  | 0.824400000  |
| 1  | 1.967000000  | 1.683500000  | 2.342300000  |
| 6  | 0.933900000  | 2.420000000  | 0.588300000  |
| 6  | 2.537600000  | -0.882600000 | 0.736200000  |
| 1  | 3.421200000  | -0.766100000 | 1.379600000  |
| 1  | 2.199500000  | -1.922000000 | 0.788000000  |
| 6  | 2.918500000  | -0.596100000 | -0.730600000 |
| 8  | 0.135100000  | 1.925200000  | -0.305500000 |
| 8  | 1.022700000  | 3.606600000  | 0.900800000  |
| 8  | 1.949100000  | -0.107400000 | -1.441900000 |
| 8  | 4.056200000  | -0.845700000 | -1.124800000 |
| 8  | -0.124800000 | -1.946400000 | -0.438000000 |
| 8  | -1.052400000 | -3.706300000 | 0.618700000  |
| 8  | -1.891600000 | 0.399600000  | -1.460400000 |
| 8  | -3.926600000 | 1.294800000  | -1.091500000 |
| 26 | 0.001700000  | -0.006000000 | -0.768400000 |
| 8  | -0.006400000 | -0.138400000 | -3.013000000 |
| 1  | -0.703000000 | 0.500500000  | -3.245100000 |
| 1  | 0.871800000  | 0.222600000  | -3.227500000 |

**11 [Fe(EDTA)(H<sub>2</sub>O)]<sup>2-</sup> Quintet**

|   |              |              |             |
|---|--------------|--------------|-------------|
| 7 | -1.484700000 | 0.028100000  | 1.129200000 |
| 6 | -0.678500000 | 0.361200000  | 2.311300000 |
| 1 | -0.511900000 | 1.441700000  | 2.318400000 |
| 1 | -1.211400000 | 0.102200000  | 3.247100000 |
| 6 | 0.680100000  | -0.370500000 | 2.309500000 |
| 1 | 1.213600000  | -0.115200000 | 3.245900000 |
| 1 | 0.513500000  | -1.451000000 | 2.312400000 |
| 7 | 1.485600000  | -0.032800000 | 1.128200000 |
| 6 | -2.440900000 | 1.060900000  | 0.693700000 |
| 1 | -3.391300000 | 1.014900000  | 1.248900000 |

|    |              |              |              |
|----|--------------|--------------|--------------|
| 1  | -1.986400000 | 2.044100000  | 0.852500000  |
| 6  | -2.734200000 | 0.958000000  | -0.831300000 |
| 6  | -2.099700000 | -1.312100000 | 1.207300000  |
| 1  | -3.007400000 | -1.305900000 | 0.593600000  |
| 1  | -2.405600000 | -1.545600000 | 2.239600000  |
| 6  | -1.219200000 | -2.469200000 | 0.656100000  |
| 6  | 2.100600000  | 1.307200000  | 1.211100000  |
| 1  | 3.007900000  | 1.303400000  | 0.597000000  |
| 1  | 2.406900000  | 1.536600000  | 2.244200000  |
| 6  | 1.219700000  | 2.466400000  | 0.665000000  |
| 6  | 2.441500000  | -1.063800000 | 0.688000000  |
| 1  | 3.392200000  | -1.020000000 | 1.242800000  |
| 1  | 1.987000000  | -2.047600000 | 0.843000000  |
| 6  | 2.734000000  | -0.954800000 | -0.836700000 |
| 8  | 0.378100000  | 2.145000000  | -0.233700000 |
| 8  | 1.446900000  | 3.602800000  | 1.133800000  |
| 8  | 1.786900000  | -0.439200000 | -1.541200000 |
| 8  | 3.820500000  | -1.387200000 | -1.249700000 |
| 8  | -0.378300000 | -2.144100000 | -0.242000000 |
| 8  | -1.445900000 | -3.607400000 | 1.120500000  |
| 8  | -1.787500000 | 0.445100000  | -1.538100000 |
| 8  | -3.820800000 | 1.392200000  | -1.242000000 |
| 26 | 0.000000000  | 0.000800000  | -0.617300000 |
| 8  | -0.003400000 | 0.010300000  | -4.004400000 |
| 1  | -0.745400000 | 0.210800000  | -3.402000000 |
| 1  | 0.740200000  | -0.193800000 | -3.405200000 |

## 12 [Fe(PaPy<sub>2</sub>O)(Cl)] Sextet

|    |              |              |              |
|----|--------------|--------------|--------------|
| 26 | -0.231000000 | 0.114100000  | -0.558900000 |
| 17 | -1.437000000 | 0.720200000  | -2.510600000 |
| 8  | 1.786300000  | -1.581300000 | 2.753400000  |
| 8  | 1.422700000  | -0.335800000 | -1.281300000 |
| 7  | -1.513300000 | -1.684400000 | -0.500200000 |
| 7  | -2.040500000 | 0.764800000  | 0.734500000  |
| 7  | 0.404700000  | -0.489700000 | 1.282900000  |
| 7  | 0.055200000  | 2.267700000  | -0.165000000 |
| 6  | -1.100800000 | -2.899600000 | -0.889600000 |
| 1  | -0.104800000 | -2.947500000 | -1.320400000 |
| 6  | -1.895500000 | -4.034500000 | -0.751300000 |
| 1  | -1.526400000 | -4.999700000 | -1.082900000 |
| 6  | -3.157700000 | -3.895100000 | -0.171200000 |
| 1  | -3.802900000 | -4.758800000 | -0.035800000 |
| 6  | -3.578300000 | -2.631000000 | 0.241100000  |
| 1  | -4.551900000 | -2.488800000 | 0.702000000  |
| 6  | -2.728400000 | -1.538200000 | 0.053500000  |
| 6  | -3.164600000 | -0.120800000 | 0.374100000  |
| 1  | -3.619700000 | 0.281900000  | -0.537500000 |
| 1  | -3.934400000 | -0.131300000 | 1.161400000  |
| 6  | -1.587900000 | 0.611500000  | 2.145200000  |
| 1  | -2.458800000 | 0.512200000  | 2.813000000  |
| 1  | -1.067100000 | 1.534200000  | 2.416200000  |

|   |              |              |              |
|---|--------------|--------------|--------------|
| 6 | -0.617700000 | -0.552800000 | 2.322100000  |
| 1 | -0.164500000 | -0.494900000 | 3.318200000  |
| 1 | -1.149800000 | -1.517400000 | 2.291900000  |
| 6 | 1.593900000  | -1.070800000 | 1.633500000  |
| 6 | 2.714300000  | -1.078600000 | 0.627700000  |
| 6 | 3.975700000  | -1.493800000 | 1.087600000  |
| 1 | 4.053100000  | -1.771000000 | 2.134200000  |
| 6 | 5.083600000  | -1.555200000 | 0.246200000  |
| 1 | 6.047000000  | -1.874800000 | 0.634500000  |
| 6 | 4.941300000  | -1.207500000 | -1.104700000 |
| 1 | 5.795400000  | -1.256500000 | -1.776800000 |
| 6 | 3.704000000  | -0.803200000 | -1.592300000 |
| 1 | 3.564000000  | -0.538600000 | -2.637000000 |
| 6 | 2.579000000  | -0.728600000 | -0.741000000 |
| 6 | -2.306600000 | 2.179200000  | 0.406800000  |
| 1 | -2.962100000 | 2.654200000  | 1.153800000  |
| 1 | -2.811100000 | 2.210500000  | -0.564600000 |
| 6 | -1.012600000 | 2.958000000  | 0.273200000  |
| 6 | -0.936000000 | 4.327300000  | 0.532900000  |
| 1 | -1.809700000 | 4.860400000  | 0.897400000  |
| 6 | 0.271400000  | 4.991900000  | 0.314600000  |
| 1 | 0.352500000  | 6.058300000  | 0.507200000  |
| 6 | 1.371100000  | 4.267600000  | -0.147100000 |
| 1 | 2.329600000  | 4.743600000  | -0.327300000 |
| 6 | 1.219400000  | 2.900900000  | -0.370400000 |
| 1 | 2.038600000  | 2.283000000  | -0.725200000 |

## 12 [Fe(PaPy<sub>2</sub>O)(Cl)]<sup>1-</sup> Quintet

|    |              |              |              |
|----|--------------|--------------|--------------|
| 26 | -0.255800000 | 0.110200000  | -0.596300000 |
| 17 | -1.918100000 | 0.495300000  | -2.554500000 |
| 8  | 2.180500000  | -1.363700000 | 2.683500000  |
| 8  | 1.532600000  | 0.062800000  | -1.332400000 |
| 7  | -1.135300000 | -1.936300000 | -0.573200000 |
| 7  | -2.135500000 | 0.292700000  | 0.816100000  |
| 7  | 0.597200000  | -0.425300000 | 1.297700000  |
| 7  | -0.494600000 | 2.258300000  | -0.205200000 |
| 6  | -0.477000000 | -3.020800000 | -1.002900000 |
| 1  | 0.465700000  | -2.827500000 | -1.508400000 |
| 6  | -0.957000000 | -4.316200000 | -0.814800000 |
| 1  | -0.388100000 | -5.166000000 | -1.180700000 |
| 6  | -2.167800000 | -4.484000000 | -0.139900000 |
| 1  | -2.572100000 | -5.477900000 | 0.037500000  |
| 6  | -2.846100000 | -3.353700000 | 0.316700000  |
| 1  | -3.784400000 | -3.445200000 | 0.858700000  |
| 6  | -2.299200000 | -2.089200000 | 0.078200000  |
| 6  | -3.032200000 | -0.816000000 | 0.465400000  |
| 1  | -3.596500000 | -0.506300000 | -0.421600000 |
| 1  | -3.750400000 | -1.031900000 | 1.276800000  |
| 6  | -1.580600000 | 0.217500000  | 2.190200000  |
| 1  | -2.380800000 | -0.056500000 | 2.903900000  |
| 1  | -1.239700000 | 1.225200000  | 2.448400000  |

|   |              |              |              |
|---|--------------|--------------|--------------|
| 6 | -0.384600000 | -0.728500000 | 2.321300000  |
| 1 | 0.037200000  | -0.613000000 | 3.330300000  |
| 1 | -0.720600000 | -1.780500000 | 2.267300000  |
| 6 | 1.852200000  | -0.808400000 | 1.598000000  |
| 6 | 2.934300000  | -0.534600000 | 0.574700000  |
| 6 | 4.257800000  | -0.723100000 | 1.011300000  |
| 1 | 4.380900000  | -1.048400000 | 2.040600000  |
| 6 | 5.364800000  | -0.516000000 | 0.189800000  |
| 1 | 6.372500000  | -0.667500000 | 0.572600000  |
| 6 | 5.152500000  | -0.115300000 | -1.138300000 |
| 1 | 5.998200000  | 0.049100000  | -1.806500000 |
| 6 | 3.858500000  | 0.068200000  | -1.608900000 |
| 1 | 3.670900000  | 0.367500000  | -2.638100000 |
| 6 | 2.716000000  | -0.129900000 | -0.782000000 |
| 6 | -2.719400000 | 1.611700000  | 0.528500000  |
| 1 | -3.440300000 | 1.925900000  | 1.305000000  |
| 1 | -3.242500000 | 1.536800000  | -0.431200000 |
| 6 | -1.643100000 | 2.668900000  | 0.363000000  |
| 6 | -1.844500000 | 4.002000000  | 0.728200000  |
| 1 | -2.779600000 | 4.299300000  | 1.197000000  |
| 6 | -0.833900000 | 4.934500000  | 0.485400000  |
| 1 | -0.969200000 | 5.977900000  | 0.760600000  |
| 6 | 0.353900000  | 4.500000000  | -0.106700000 |
| 1 | 1.171000000  | 5.186400000  | -0.309700000 |
| 6 | 0.481400000  | 3.149900000  | -0.430600000 |
| 1 | 1.382100000  | 2.747100000  | -0.886100000 |

### 13 [Fe(NTA)(H<sub>2</sub>O)<sub>2</sub>] Sextet

|    |              |              |              |
|----|--------------|--------------|--------------|
| 7  | 0.859200000  | -1.076500000 | 0.035500000  |
| 6  | 1.003100000  | -1.365500000 | 1.478200000  |
| 1  | 1.190500000  | -2.428500000 | 1.667900000  |
| 1  | 1.860800000  | -0.804800000 | 1.866300000  |
| 6  | 0.132400000  | -2.115500000 | -0.721500000 |
| 1  | 0.810900000  | -2.851800000 | -1.167500000 |
| 1  | -0.532200000 | -2.654000000 | -0.036000000 |
| 6  | -0.230900000 | -0.902200000 | 2.271300000  |
| 6  | -0.757600000 | -1.493300000 | -1.814300000 |
| 8  | -0.921900000 | 0.061000000  | 1.676300000  |
| 8  | -0.501500000 | -1.375300000 | 3.356200000  |
| 8  | -1.153800000 | -2.152400000 | -2.753700000 |
| 8  | -1.079200000 | -0.226900000 | -1.589400000 |
| 6  | 2.116900000  | -0.643200000 | -0.606500000 |
| 1  | 2.977100000  | -1.229400000 | -0.262900000 |
| 1  | 2.027600000  | -0.784900000 | -1.689600000 |
| 6  | 2.366000000  | 0.855500000  | -0.363800000 |
| 8  | 3.482700000  | 1.330300000  | -0.423900000 |
| 8  | 1.260300000  | 1.544600000  | -0.137500000 |
| 26 | -0.501600000 | 0.749000000  | -0.061300000 |
| 8  | -2.828700000 | 1.106600000  | 0.161700000  |
| 1  | -3.230300000 | 0.620600000  | -0.579200000 |
| 1  | -2.983500000 | 0.578000000  | 0.965700000  |

|   |              |             |              |
|---|--------------|-------------|--------------|
| 8 | -0.898400000 | 2.837000000 | -0.380700000 |
| 1 | -1.660400000 | 3.252000000 | 0.055100000  |
| 1 | -0.089700000 | 3.351200000 | -0.207000000 |

### 13 [Fe(NTA)] Quintet

|    |              |              |              |
|----|--------------|--------------|--------------|
| 7  | 1.091300000  | -0.066700000 | 0.883000000  |
| 6  | 0.250100000  | -0.160700000 | 2.089300000  |
| 1  | 0.755900000  | -0.691200000 | 2.907600000  |
| 1  | 0.040800000  | 0.855600000  | 2.444300000  |
| 6  | 1.893400000  | -1.274800000 | 0.612600000  |
| 1  | 2.912600000  | -1.192700000 | 1.014600000  |
| 1  | 1.415500000  | -2.124900000 | 1.114400000  |
| 6  | -1.131800000 | -0.814800000 | 1.838900000  |
| 6  | 1.967000000  | -1.650800000 | -0.892900000 |
| 8  | -1.565600000 | -0.751000000 | 0.612700000  |
| 8  | -1.742500000 | -1.289900000 | 2.796000000  |
| 8  | 2.889600000  | -2.375100000 | -1.264800000 |
| 8  | 0.996900000  | -1.205300000 | -1.636600000 |
| 6  | 1.838400000  | 1.199000000  | 0.776100000  |
| 1  | 2.291900000  | 1.498100000  | 1.732000000  |
| 1  | 2.654400000  | 1.054200000  | 0.057600000  |
| 6  | 0.969200000  | 2.368900000  | 0.232900000  |
| 8  | 1.314100000  | 3.521500000  | 0.498500000  |
| 8  | -0.039800000 | 2.016400000  | -0.503800000 |
| 26 | -0.305500000 | 0.032600000  | -0.840300000 |
| 8  | -3.926800000 | -0.394200000 | -0.558800000 |
| 1  | -4.281800000 | -1.242200000 | -0.863400000 |
| 1  | -3.188000000 | -0.627500000 | 0.071400000  |
| 8  | -1.965600000 | 0.727100000  | -2.090700000 |
| 1  | -2.802400000 | 0.411800000  | -1.658200000 |
| 1  | -1.896400000 | 1.682100000  | -1.916500000 |

### 14 [Fe(Py<sub>3</sub>tacn)]<sup>3+</sup> Doublet

|    |              |              |              |
|----|--------------|--------------|--------------|
| 26 | -0.009400000 | -0.009100000 | 0.308800000  |
| 7  | 1.240700000  | -1.172600000 | -0.777100000 |
| 7  | 1.574500000  | 0.020500000  | 1.577100000  |
| 7  | -1.646000000 | -0.441300000 | -0.793300000 |
| 7  | 0.454000000  | 1.666900000  | -0.732300000 |
| 7  | -0.756400000 | -1.438300000 | 1.532900000  |
| 7  | -0.883700000 | 1.325700000  | 1.558200000  |
| 6  | 0.920600000  | -1.942400000 | -1.844500000 |
| 6  | 1.854100000  | -2.743900000 | -2.493100000 |
| 6  | 3.170900000  | -2.762500000 | -2.027600000 |
| 6  | 3.510300000  | -1.962000000 | -0.932800000 |
| 6  | 2.530000000  | -1.174600000 | -0.336200000 |
| 6  | 2.819300000  | -0.195500000 | 0.770400000  |
| 6  | 1.553300000  | 1.382500000  | 2.217500000  |

|   |              |              |              |
|---|--------------|--------------|--------------|
| 6 | 1.410100000  | -1.072800000 | 2.627100000  |
| 6 | 0.123700000  | 1.719600000  | 2.634200000  |
| 6 | 0.414800000  | -2.131000000 | 2.165800000  |
| 6 | -2.161200000 | 0.257900000  | -1.833100000 |
| 6 | -2.280300000 | -1.580500000 | -0.392500000 |
| 6 | 1.345800000  | 1.806200000  | -1.742200000 |
| 6 | -0.240300000 | 2.766700000  | -0.321200000 |
| 6 | -1.564900000 | -2.368100000 | 0.675500000  |
| 6 | -1.637400000 | -0.780200000 | 2.588300000  |
| 6 | -1.285800000 | 2.511400000  | 0.736100000  |
| 6 | -2.064500000 | 0.622500000  | 2.164000000  |
| 6 | -3.323100000 | -0.131600000 | -2.489300000 |
| 6 | -3.452600000 | -2.019800000 | -1.000800000 |
| 6 | 1.583800000  | 3.025500000  | -2.366400000 |
| 6 | -0.039500000 | 4.019400000  | -0.893900000 |
| 6 | -3.987100000 | -1.285500000 | -2.063600000 |
| 6 | 0.885800000  | 4.155700000  | -1.932900000 |
| 1 | -0.107900000 | -1.904500000 | -2.182100000 |
| 1 | 1.547200000  | -3.341600000 | -3.345700000 |
| 1 | 3.921100000  | -3.384800000 | -2.507700000 |
| 1 | 4.527200000  | -1.944400000 | -0.551100000 |
| 1 | 3.112200000  | 0.765900000  | 0.334600000  |
| 1 | 3.648100000  | -0.521500000 | 1.407500000  |
| 1 | 1.925800000  | 2.099500000  | 1.484800000  |
| 1 | 2.224800000  | 1.414300000  | 3.084300000  |
| 1 | 1.083900000  | -0.602700000 | 3.555900000  |
| 1 | 2.380600000  | -1.530300000 | 2.839000000  |
| 1 | -0.149800000 | 1.202700000  | 3.554700000  |
| 1 | 0.036700000  | 2.789500000  | 2.844800000  |
| 1 | 0.859500000  | -2.785800000 | 1.414800000  |
| 1 | 0.094700000  | -2.757800000 | 3.007300000  |
| 1 | -1.619500000 | 1.145000000  | -2.138400000 |
| 1 | 1.867500000  | 0.910800000  | -2.056900000 |
| 1 | -0.875200000 | -3.074900000 | 0.200900000  |
| 1 | -2.256100000 | -2.959000000 | 1.285800000  |
| 1 | -1.076800000 | -0.753500000 | 3.523400000  |
| 1 | -2.517700000 | -1.402000000 | 2.776000000  |
| 1 | -2.242200000 | 2.280200000  | 0.254300000  |
| 1 | -1.452400000 | 3.389300000  | 1.369400000  |
| 1 | -2.850900000 | 0.583000000  | 1.409100000  |
| 1 | -2.454900000 | 1.183200000  | 3.022200000  |
| 1 | -3.697500000 | 0.462900000  | -3.316800000 |
| 1 | -3.937300000 | -2.928100000 | -0.653800000 |
| 1 | 2.305500000  | 3.082800000  | -3.175300000 |
| 1 | -0.601900000 | 4.876900000  | -0.535100000 |
| 1 | -4.901700000 | -1.611100000 | -2.551500000 |
| 1 | 1.056900000  | 5.124700000  | -2.393400000 |

#### 14 [Fe(Py<sub>3</sub>tacn)]<sup>2+</sup> Singlet

|    |              |             |              |
|----|--------------|-------------|--------------|
| 26 | -0.000600000 | 0.000000000 | 0.286300000  |
| 7  | -1.724800000 | 0.142300000 | -0.777900000 |

|   |              |              |              |
|---|--------------|--------------|--------------|
| 7 | -1.189600000 | -1.083300000 | 1.555900000  |
| 7 | 0.987300000  | 1.422100000  | -0.776200000 |
| 7 | 0.739600000  | -1.565900000 | -0.775400000 |
| 7 | -0.346300000 | 1.571400000  | 1.555000000  |
| 7 | 1.531400000  | -0.486700000 | 1.557800000  |
| 6 | -2.015900000 | 0.966300000  | -1.807400000 |
| 6 | -3.257700000 | 0.985500000  | -2.436300000 |
| 6 | -4.255300000 | 0.121400000  | -1.983000000 |
| 6 | -3.963300000 | -0.740600000 | -0.924000000 |
| 6 | -2.691800000 | -0.713600000 | -0.353600000 |
| 6 | -2.265000000 | -1.685200000 | 0.722800000  |
| 6 | -0.300300000 | -2.107900000 | 2.175800000  |
| 6 | -1.765700000 | -0.154300000 | 2.600300000  |
| 6 | 1.013700000  | -1.448100000 | 2.603500000  |
| 6 | -1.679400000 | 1.313600000  | 2.172700000  |
| 6 | 1.848700000  | 1.262400000  | -1.803700000 |
| 6 | 0.728500000  | 2.687400000  | -0.352500000 |
| 6 | 0.172900000  | -2.230900000 | -1.805000000 |
| 6 | 1.964000000  | -1.974600000 | -0.349700000 |
| 6 | -0.328300000 | 2.803800000  | 0.722000000  |
| 6 | 0.744300000  | 1.605700000  | 2.601400000  |
| 6 | 2.591000000  | -1.118500000 | 0.726800000  |
| 6 | 1.973200000  | 0.797000000  | 2.176100000  |
| 6 | 2.487600000  | 2.328200000  | -2.431300000 |
| 6 | 1.341800000  | 3.802200000  | -0.921700000 |
| 6 | 0.778100000  | -3.316000000 | -2.432700000 |
| 6 | 2.624300000  | -3.062200000 | -0.919000000 |
| 6 | 2.236700000  | 3.624300000  | -1.978600000 |
| 6 | 2.025200000  | -3.747000000 | -1.978100000 |
| 1 | -1.217200000 | 1.622800000  | -2.134200000 |
| 1 | -3.433100000 | 1.668200000  | -3.261600000 |
| 1 | -5.238800000 | 0.116100000  | -2.443500000 |
| 1 | -4.711500000 | -1.431800000 | -0.547100000 |
| 1 | -1.854600000 | -2.581300000 | 0.244200000  |
| 1 | -3.118400000 | -2.010600000 | 1.331100000  |
| 1 | -0.113700000 | -2.878500000 | 1.426000000  |
| 1 | -0.776100000 | -2.593200000 | 3.039200000  |
| 1 | -1.221900000 | -0.312600000 | 3.533700000  |
| 1 | -2.808300000 | -0.418200000 | 2.808400000  |
| 1 | 0.878000000  | -0.896200000 | 3.535600000  |
| 1 | 1.763300000  | -2.218800000 | 2.813800000  |
| 1 | -2.438700000 | 1.537200000  | 1.421600000  |
| 1 | -1.863300000 | 1.968400000  | 3.035800000  |
| 1 | 2.019000000  | 0.242500000  | -2.130100000 |
| 1 | -0.795000000 | -1.868300000 | -2.132900000 |
| 1 | -1.308700000 | 2.896800000  | 0.241700000  |
| 1 | -0.184200000 | 3.705400000  | 1.330600000  |
| 1 | 0.333300000  | 1.213700000  | 3.533900000  |
| 1 | 1.036700000  | 2.640600000  | 2.810200000  |
| 1 | 3.163300000  | -0.316100000 | 0.248100000  |
| 1 | 3.298200000  | -1.694900000 | 1.336500000  |
| 1 | 2.547900000  | 1.342700000  | 1.426100000  |

|   |             |              |              |
|---|-------------|--------------|--------------|
| 1 | 2.630600000 | 0.629000000  | 3.040500000  |
| 1 | 3.168400000 | 2.138900000  | -3.254900000 |
| 1 | 1.116300000 | 4.795800000  | -0.545300000 |
| 1 | 0.275600000 | -3.810000000 | -3.258100000 |
| 1 | 3.596800000 | -3.363900000 | -0.541000000 |
| 1 | 2.724700000 | 4.478700000  | -2.438200000 |
| 1 | 2.522300000 | -4.596000000 | -2.437700000 |

**15 [Fe(bpy)CN<sub>4</sub>]<sup>1-</sup> Doublet**

|    |              |              |              |
|----|--------------|--------------|--------------|
| 26 | -0.001300000 | -1.134300000 | 0.000000000  |
| 7  | -1.303400000 | 0.431900000  | 0.000000000  |
| 7  | 1.304600000  | 0.429500000  | 0.000000000  |
| 7  | -0.001400000 | -0.892700000 | 3.130200000  |
| 7  | -2.302800000 | -3.191600000 | 0.000000000  |
| 7  | 2.297900000  | -3.194400000 | 0.000000000  |
| 7  | -0.001400000 | -0.892700000 | -3.130200000 |
| 6  | -1.380200000 | -2.470100000 | 0.000000000  |
| 6  | 1.376100000  | -2.472000000 | 0.000000000  |
| 6  | -0.001400000 | -1.066100000 | -1.971500000 |
| 6  | -0.001400000 | -1.066100000 | 1.971500000  |
| 6  | -0.736000000 | 1.660200000  | 0.000000000  |
| 6  | -1.519000000 | 2.819700000  | 0.000000000  |
| 6  | -2.906100000 | 2.705400000  | 0.000000000  |
| 6  | -3.476700000 | 1.433400000  | 0.000000000  |
| 6  | -2.640000000 | 0.319700000  | 0.000000000  |
| 6  | 0.739300000  | 1.658900000  | 0.000000000  |
| 6  | 2.641000000  | 0.315100000  | 0.000000000  |
| 6  | 3.479600000  | 1.427300000  | 0.000000000  |
| 6  | 2.911300000  | 2.700300000  | 0.000000000  |
| 6  | 1.524300000  | 2.817000000  | 0.000000000  |
| 1  | 1.059100000  | 3.796300000  | 0.000000000  |
| 1  | 3.535400000  | 3.590000000  | 0.000000000  |
| 1  | 4.555400000  | 1.284100000  | 0.000000000  |
| 1  | 3.025100000  | -0.698800000 | 0.000000000  |
| 1  | -1.052100000 | 3.798200000  | 0.000000000  |
| 1  | -3.528700000 | 3.596200000  | 0.000000000  |
| 1  | -4.552800000 | 1.292100000  | 0.000000000  |
| 1  | -3.025800000 | -0.693500000 | 0.000000000  |

**15 [Fe(bpy)CN<sub>4</sub>]<sup>2-</sup> Singlet**

|    |              |              |              |
|----|--------------|--------------|--------------|
| 26 | -0.000700000 | -1.097600000 | 0.000000000  |
| 7  | -1.280900000 | 0.414500000  | 0.000000000  |
| 7  | 1.281500000  | 0.412700000  | 0.000000000  |
| 7  | -0.000700000 | -0.966100000 | 3.156500000  |
| 7  | -2.356100000 | -3.157400000 | 0.000000000  |
| 7  | 2.351900000  | -3.160500000 | 0.000000000  |
| 7  | -0.000700000 | -0.966100000 | -3.156500000 |
| 6  | -1.423700000 | -2.438700000 | 0.000000000  |
| 6  | 1.420400000  | -2.440600000 | 0.000000000  |



|   |              |              |              |
|---|--------------|--------------|--------------|
| 6 | -0.000700000 | -1.093500000 | -1.986500000 |
| 6 | -0.000700000 | -1.093500000 | 1.986500000  |
| 6 | -0.730500000 | 1.661800000  | 0.000000000  |
| 6 | -1.522900000 | 2.820000000  | 0.000000000  |
| 6 | -2.908100000 | 2.706300000  | 0.000000000  |
| 6 | -3.467200000 | 1.421000000  | 0.000000000  |
| 6 | -2.627300000 | 0.313900000  | 0.000000000  |
| 6 | 0.732800000  | 1.660800000  | 0.000000000  |
| 6 | 2.627800000  | 0.310400000  | 0.000000000  |
| 6 | 3.469100000  | 1.416300000  | 0.000000000  |
| 6 | 2.911800000  | 2.702400000  | 0.000000000  |
| 6 | 1.526800000  | 2.817900000  | 0.000000000  |
| 1 | 1.059600000  | 3.798300000  | 0.000000000  |
| 1 | 3.541800000  | 3.589800000  | 0.000000000  |
| 1 | 4.545800000  | 1.265200000  | 0.000000000  |
| 1 | 3.007000000  | -0.706500000 | 0.000000000  |
| 1 | -1.054400000 | 3.799700000  | 0.000000000  |
| 1 | -3.536900000 | 3.594700000  | 0.000000000  |
| 1 | -4.544000000 | 1.271300000  | 0.000000000  |
| 1 | -3.007900000 | -0.702400000 | 0.000000000  |

**16 [Fe(DITim)<sub>2</sub>]<sup>1+</sup> Doublet**

|    |              |              |              |
|----|--------------|--------------|--------------|
| 26 | 0.000000000  | 0.006200000  | 0.000000000  |
| 16 | 0.894900000  | 1.460000000  | -1.416800000 |
| 16 | -0.895000000 | 1.459900000  | 1.416700000  |
| 7  | -1.760000000 | 0.152700000  | -1.015400000 |
| 7  | 1.760000000  | 0.152900000  | 1.015300000  |
| 7  | 0.691700000  | -1.555600000 | -1.222800000 |
| 7  | -0.691500000 | -1.555600000 | 1.222900000  |
| 6  | -0.114000000 | -2.336100000 | -2.031500000 |
| 6  | 0.678400000  | -3.173500000 | -2.777000000 |
| 7  | 1.977200000  | -2.889300000 | -2.405900000 |
| 6  | 1.942300000  | -1.906300000 | -1.476800000 |
| 6  | -1.593900000 | -2.146200000 | -2.062400000 |
| 6  | -2.009600000 | -0.674900000 | -2.216300000 |
| 6  | -2.583000000 | 1.121200000  | -0.757900000 |
| 6  | -2.351800000 | 2.042500000  | 0.429800000  |
| 6  | -3.789500000 | 1.422800000  | -1.627100000 |
| 6  | -2.078000000 | 3.481500000  | -0.076300000 |
| 6  | -3.588800000 | 2.044300000  | 1.359800000  |
| 6  | 0.114300000  | -2.336000000 | 2.031600000  |
| 6  | -0.678100000 | -3.173400000 | 2.777200000  |
| 7  | -1.976900000 | -2.889200000 | 2.406100000  |
| 6  | -1.942100000 | -1.906300000 | 1.476800000  |
| 6  | 1.594200000  | -2.146000000 | 2.062400000  |
| 6  | 2.009800000  | -0.674700000 | 2.216200000  |
| 6  | 2.582900000  | 1.121600000  | 0.757900000  |
| 6  | 3.789300000  | 1.423300000  | 1.627100000  |
| 6  | 2.351600000  | 2.042800000  | -0.429900000 |
| 6  | 2.077500000  | 3.481800000  | 0.076200000  |
| 6  | 3.588600000  | 2.044800000  | -1.359800000 |

|   |              |              |              |
|---|--------------|--------------|--------------|
| 1 | 2.812400000  | -3.318300000 | -2.782500000 |
| 1 | 2.824300000  | -1.458200000 | -1.047500000 |
| 1 | 0.440300000  | -3.918400000 | -3.521300000 |
| 1 | -2.062300000 | -2.570100000 | -1.165900000 |
| 1 | -2.003100000 | -2.697000000 | -2.916700000 |
| 1 | -1.457000000 | -0.224200000 | -3.051300000 |
| 1 | -3.069400000 | -0.660300000 | -2.478000000 |
| 1 | -4.301300000 | 2.325400000  | -1.296400000 |
| 1 | -3.495900000 | 1.568700000  | -2.672500000 |
| 1 | -4.520400000 | 0.604900000  | -1.599600000 |
| 1 | -1.894200000 | 4.129900000  | 0.785900000  |
| 1 | -1.196800000 | 3.505800000  | -0.722200000 |
| 1 | -2.933600000 | 3.892900000  | -0.626000000 |
| 1 | -3.369300000 | 2.650800000  | 2.244000000  |
| 1 | -4.471300000 | 2.476500000  | 0.873600000  |
| 1 | -3.835500000 | 1.034600000  | 1.704900000  |
| 1 | -2.812100000 | -3.318300000 | 2.782800000  |
| 1 | -0.439900000 | -3.918100000 | 3.521600000  |
| 1 | -2.824100000 | -1.458300000 | 1.047500000  |
| 1 | 2.003400000  | -2.696800000 | 2.916600000  |
| 1 | 2.062500000  | -2.569900000 | 1.165900000  |
| 1 | 3.069700000  | -0.660100000 | 2.477700000  |
| 1 | 1.457400000  | -0.224100000 | 3.051400000  |
| 1 | 4.300800000  | 2.326100000  | 1.296600000  |
| 1 | 3.495700000  | 1.569000000  | 2.672500000  |
| 1 | 4.520400000  | 0.605600000  | 1.599400000  |
| 1 | 1.893600000  | 4.130100000  | -0.786100000 |
| 1 | 1.196300000  | 3.506000000  | 0.722100000  |
| 1 | 2.933000000  | 3.893300000  | 0.625900000  |
| 1 | 3.369000000  | 2.651300000  | -2.244000000 |
| 1 | 4.471000000  | 2.477100000  | -0.873500000 |
| 1 | 3.835500000  | 1.035100000  | -1.704900000 |

**16 [Fe(DITim)<sub>2</sub>]<sup>2-</sup> Singlet**

|    |              |              |              |
|----|--------------|--------------|--------------|
| 26 | 0.000000000  | 0.063200000  | 0.000000000  |
| 16 | 0.959000000  | 1.476600000  | -1.692500000 |
| 16 | -0.959800000 | 1.476000000  | 1.692600000  |
| 7  | -2.306100000 | 0.045600000  | -0.550700000 |
| 7  | 2.306100000  | 0.046500000  | 0.550600000  |
| 7  | 0.105300000  | -1.662300000 | -1.523600000 |
| 7  | -0.104500000 | -1.662300000 | 1.523600000  |
| 6  | -0.943400000 | -2.438500000 | -1.977900000 |
| 6  | -0.519500000 | -3.193100000 | -3.046600000 |
| 7  | 0.811300000  | -2.861200000 | -3.232300000 |
| 6  | 1.137800000  | -1.927500000 | -2.299600000 |
| 6  | -2.312100000 | -2.317100000 | -1.388500000 |
| 6  | -2.905600000 | -0.899000000 | -1.502200000 |

|   |              |              |              |
|---|--------------|--------------|--------------|
| 6 | -2.948200000 | 1.128700000  | -0.276600000 |
| 6 | -2.418200000 | 2.131600000  | 0.756700000  |
| 6 | -4.259400000 | 1.479200000  | -0.965100000 |
| 6 | -2.029400000 | 3.441500000  | 0.025900000  |
| 6 | -3.536700000 | 2.430800000  | 1.786500000  |
| 6 | 0.944600000  | -2.438100000 | 1.977800000  |
| 6 | 0.521100000  | -3.193000000 | 3.046500000  |
| 7 | -0.809800000 | -2.861600000 | 3.232400000  |
| 6 | -1.136700000 | -1.927900000 | 2.299800000  |
| 6 | 2.313100000  | -2.316200000 | 1.388200000  |
| 6 | 2.906100000  | -0.898000000 | 1.501900000  |
| 6 | 2.947700000  | 1.129900000  | 0.276500000  |
| 6 | 4.258800000  | 1.481000000  | 0.964900000  |
| 6 | 2.417200000  | 2.132800000  | -0.756600000 |
| 6 | 2.027800000  | 3.442400000  | -0.025600000 |
| 6 | 3.535400000  | 2.432700000  | -1.786500000 |
| 1 | 1.419800000  | -3.212200000 | -3.958500000 |
| 1 | 2.097300000  | -1.435600000 | -2.246800000 |
| 1 | -1.029200000 | -3.906000000 | -3.677800000 |
| 1 | -2.302200000 | -2.612100000 | -0.331900000 |
| 1 | -2.983400000 | -3.010800000 | -1.909900000 |
| 1 | -2.764900000 | -0.530300000 | -2.529100000 |
| 1 | -3.988100000 | -0.979800000 | -1.333900000 |
| 1 | -4.555100000 | 2.511900000  | -0.781600000 |
| 1 | -4.183600000 | 1.336500000  | -2.049000000 |
| 1 | -5.074000000 | 0.834500000  | -0.606900000 |
| 1 | -1.677700000 | 4.167000000  | 0.766700000  |
| 1 | -1.220400000 | 3.259100000  | -0.687300000 |
| 1 | -2.880900000 | 3.889500000  | -0.507500000 |
| 1 | -3.138500000 | 3.106700000  | 2.549400000  |
| 1 | -4.414000000 | 2.913500000  | 1.334400000  |
| 1 | -3.861000000 | 1.514700000  | 2.293300000  |
| 1 | -1.418000000 | -3.212900000 | 3.958700000  |
| 1 | 1.031200000  | -3.905800000 | 3.677600000  |
| 1 | -2.096400000 | -1.436400000 | 2.247200000  |
| 1 | 2.984800000  | -3.009700000 | 1.909500000  |
| 1 | 2.303300000  | -2.611300000 | 0.331600000  |
| 1 | 3.988600000  | -0.978300000 | 1.333500000  |
| 1 | 2.765400000  | -0.529400000 | 2.528800000  |
| 1 | 4.554100000  | 2.513800000  | 0.781600000  |
| 1 | 4.183100000  | 1.338100000  | 2.048800000  |
| 1 | 5.073700000  | 0.836700000  | 0.606700000  |
| 1 | 1.675700000  | 4.167800000  | -0.766200000 |
| 1 | 1.218900000  | 3.259500000  | 0.687600000  |
| 1 | 2.879100000  | 3.890600000  | 0.507800000  |
| 1 | 3.136800000  | 3.108400000  | -2.549200000 |
| 1 | 4.412500000  | 2.915700000  | -1.334400000 |
| 1 | 3.860100000  | 1.516700000  | -2.293400000 |

**17** [Fe(H<sub>2</sub>O)<sub>6</sub>]<sup>3+</sup> Sextet

|    |             |             |             |
|----|-------------|-------------|-------------|
| 26 | 0.000000000 | 0.000100000 | 0.000000000 |
|----|-------------|-------------|-------------|

|   |              |              |              |
|---|--------------|--------------|--------------|
| 8 | -1.606400000 | 0.254200000  | -1.246500000 |
| 1 | -1.795100000 | 1.041400000  | -1.805300000 |
| 8 | 0.701700000  | 1.851900000  | -0.526500000 |
| 1 | 1.311800000  | 2.056800000  | -1.270400000 |
| 8 | 1.606500000  | -0.254300000 | 1.246600000  |
| 1 | 1.794600000  | -1.041100000 | 1.806000000  |
| 8 | 1.061500000  | -0.839500000 | -1.538500000 |
| 1 | 0.745200000  | -0.980800000 | -2.459100000 |
| 8 | -0.701800000 | -1.852000000 | 0.526200000  |
| 1 | -1.311400000 | -2.057100000 | 1.270400000  |
| 8 | -1.061400000 | 0.839600000  | 1.538600000  |
| 1 | -1.984400000 | 1.177300000  | 1.497200000  |
| 1 | -2.335500000 | -0.388100000 | -1.399600000 |
| 1 | 0.492200000  | 2.704800000  | -0.083500000 |
| 1 | -0.492800000 | -2.704700000 | 0.082700000  |
| 1 | 2.336200000  | 0.387500000  | 1.399000000  |
| 1 | 1.984200000  | -1.177900000 | -1.496700000 |
| 1 | -0.744900000 | 0.981000000  | 2.459200000  |

**17 [Fe(H<sub>2</sub>O)<sub>6</sub>]<sup>2+</sup> Quintet**

|    |              |              |              |
|----|--------------|--------------|--------------|
| 26 | 0.000000000  | 0.000000000  | 0.000000000  |
| 8  | -1.853500000 | -0.006000000 | -1.113800000 |
| 1  | -1.941900000 | -0.004900000 | -2.083900000 |
| 8  | 1.151300000  | 0.008100000  | -1.792800000 |
| 1  | 1.482900000  | -0.773700000 | -2.270800000 |
| 8  | 1.853500000  | 0.006100000  | 1.113800000  |
| 1  | 1.941900000  | 0.005100000  | 2.083900000  |
| 8  | 0.009500000  | -2.170200000 | -0.003600000 |
| 1  | -0.556700000 | -2.753100000 | -0.540600000 |
| 8  | -1.151300000 | -0.008100000 | 1.792800000  |
| 1  | -1.482900000 | 0.773800000  | 2.270800000  |
| 8  | -0.009400000 | 2.170200000  | 0.003500000  |
| 1  | -0.581000000 | 2.749800000  | -0.531400000 |
| 1  | -2.755600000 | -0.010700000 | -0.746300000 |
| 1  | 1.476100000  | 0.794500000  | -2.267900000 |
| 1  | -1.476200000 | -0.794400000 | 2.268000000  |
| 1  | 2.755600000  | 0.010400000  | 0.746300000  |
| 1  | 0.580900000  | -2.749800000 | 0.531500000  |
| 1  | 0.556900000  | 2.753100000  | 0.540400000  |

**18<sup>2+</sup> [Fe(Ohishis)(H<sub>2</sub>O)<sub>3</sub>]<sup>2+</sup> Quintet**

|   |              |              |              |
|---|--------------|--------------|--------------|
| 6 | 4.320700000  | 0.220200000  | 0.142000000  |
| 6 | 3.094600000  | -1.586200000 | -0.178200000 |
| 6 | 2.995600000  | 0.539600000  | 0.313300000  |
| 6 | -4.281300000 | -0.096700000 | 0.205200000  |
| 6 | -2.905600000 | -1.780700000 | -0.169500000 |
| 6 | -2.986400000 | 0.345600000  | 0.325100000  |
| 7 | 4.360900000  | -1.120000000 | -0.168400000 |
| 7 | 2.232600000  | -0.613900000 | 0.108600000  |

|    |              |              |              |
|----|--------------|--------------|--------------|
| 7  | -4.208400000 | -1.434800000 | -0.109300000 |
| 7  | -2.126500000 | -0.732000000 | 0.085600000  |
| 6  | 2.458600000  | 1.883700000  | 0.726700000  |
| 6  | 1.709100000  | 2.724200000  | -0.347500000 |
| 6  | 0.286800000  | 2.265400000  | -0.536800000 |
| 6  | -2.547100000 | 1.736300000  | 0.693400000  |
| 7  | -0.725400000 | 3.114800000  | -0.387400000 |
| 8  | 0.028500000  | 1.060700000  | -0.817700000 |
| 6  | -2.122400000 | 2.664400000  | -0.490600000 |
| 1  | 5.215100000  | 0.818900000  | 0.224500000  |
| 1  | 2.842800000  | -2.615700000 | -0.381900000 |
| 1  | -5.223900000 | 0.415600000  | 0.324900000  |
| 1  | -2.566500000 | -2.783300000 | -0.380800000 |
| 1  | 1.817800000  | 1.777800000  | 1.610800000  |
| 1  | 3.314900000  | 2.480200000  | 1.053200000  |
| 1  | -3.378500000 | 2.210800000  | 1.222400000  |
| 1  | -1.726300000 | 1.687100000  | 1.416300000  |
| 1  | 2.222500000  | 2.644000000  | -1.312400000 |
| 1  | 1.731600000  | 3.777700000  | -0.054000000 |
| 1  | -0.532400000 | 4.089600000  | -0.192500000 |
| 1  | -2.248200000 | 2.153400000  | -1.447900000 |
| 1  | -2.737500000 | 3.564700000  | -0.509500000 |
| 1  | -4.994500000 | -2.055500000 | -0.257000000 |
| 1  | 5.195400000  | -1.665200000 | -0.345700000 |
| 26 | 0.059500000  | -0.754900000 | 0.019900000  |
| 8  | 0.044600000  | -0.647500000 | 2.226600000  |
| 1  | -0.740200000 | -0.723700000 | 2.788600000  |
| 1  | 0.823400000  | -0.688600000 | 2.800400000  |
| 8  | 0.081100000  | -1.604700000 | -2.096900000 |
| 1  | 0.836900000  | -1.359200000 | -2.651400000 |
| 1  | -0.704900000 | -1.431900000 | -2.636700000 |
| 8  | 0.111900000  | -3.000100000 | 0.291000000  |
| 1  | 0.157800000  | -3.569900000 | -0.490300000 |
| 1  | 0.151900000  | -3.560300000 | 1.078700000  |

**18<sup>3+</sup> [Fe(Ohishis)(H<sub>2</sub>O)<sub>3</sub>]<sup>3+</sup> Sextet**

|   |              |              |              |
|---|--------------|--------------|--------------|
| 6 | 4.264900000  | 0.189800000  | 0.139600000  |
| 6 | 3.029400000  | -1.606400000 | -0.203800000 |
| 6 | 2.948600000  | 0.542900000  | 0.293700000  |
| 6 | -4.205000000 | -0.216900000 | 0.206800000  |
| 6 | -2.783500000 | -1.876500000 | -0.089100000 |
| 6 | -2.933900000 | 0.293100000  | 0.295000000  |
| 7 | 4.286200000  | -1.152200000 | -0.175100000 |
| 7 | 2.167400000  | -0.608200000 | 0.070200000  |
| 7 | -4.082700000 | -1.566800000 | -0.039900000 |
| 7 | -2.031800000 | -0.774400000 | 0.101300000  |
| 6 | 2.457900000  | 1.895600000  | 0.745000000  |
| 6 | 1.666000000  | 2.768200000  | -0.267000000 |
| 6 | 0.238800000  | 2.326700000  | -0.395100000 |
| 6 | -2.601200000 | 1.723100000  | 0.640500000  |

|    |              |              |              |
|----|--------------|--------------|--------------|
| 7  | -0.784900000 | 3.146500000  | -0.419700000 |
| 8  | -0.022600000 | 1.067900000  | -0.474200000 |
| 6  | -2.184300000 | 2.673100000  | -0.528100000 |
| 1  | 5.171200000  | 0.769900000  | 0.240400000  |
| 1  | 2.770300000  | -2.632400000 | -0.414700000 |
| 1  | -5.168400000 | 0.261800000  | 0.311300000  |
| 1  | -2.413900000 | -2.877100000 | -0.250800000 |
| 1  | 1.878800000  | 1.800600000  | 1.671900000  |
| 1  | 3.346700000  | 2.469200000  | 1.021100000  |
| 1  | -3.504400000 | 2.141700000  | 1.093100000  |
| 1  | -1.845000000 | 1.762600000  | 1.431000000  |
| 1  | 2.125800000  | 2.717600000  | -1.262900000 |
| 1  | 1.704300000  | 3.815800000  | 0.046000000  |
| 1  | -0.611700000 | 4.147900000  | -0.373500000 |
| 1  | -2.308700000 | 2.191700000  | -1.502000000 |
| 1  | -2.802300000 | 3.570900000  | -0.523700000 |
| 1  | -4.851700000 | -2.222500000 | -0.150000000 |
| 1  | 5.120000000  | -1.708600000 | -0.344600000 |
| 26 | 0.071000000  | -0.736900000 | -0.032100000 |
| 8  | 0.090300000  | -0.761900000 | 2.106000000  |
| 1  | -0.692500000 | -0.775800000 | 2.681000000  |
| 1  | 0.880100000  | -0.734400000 | 2.670700000  |
| 8  | 0.082600000  | -1.359600000 | -2.098400000 |
| 1  | 0.838500000  | -1.171300000 | -2.680100000 |
| 1  | -0.713200000 | -1.300800000 | -2.653800000 |
| 8  | 0.166800000  | -2.909800000 | 0.167800000  |
| 1  | 0.211100000  | -3.542500000 | -0.567500000 |
| 1  | 0.218200000  | -3.409100000 | 0.999300000  |

**19<sup>2+</sup> [Fe(Ohishis)(Im)(H<sub>2</sub>O)<sub>2</sub>]<sup>2+</sup> Quintet**

|   |              |              |              |
|---|--------------|--------------|--------------|
| 6 | -3.818300000 | -2.094000000 | 0.082300000  |
| 6 | -3.211900000 | -0.035500000 | -0.397500000 |
| 6 | -2.476400000 | -1.950700000 | 0.313400000  |
| 6 | 4.216800000  | 0.913700000  | 0.136100000  |
| 6 | 2.404300000  | 2.024500000  | -0.426000000 |
| 6 | 3.123200000  | 0.105900000  | 0.294700000  |
| 7 | -4.264300000 | -0.875800000 | -0.369100000 |
| 7 | -2.109200000 | -0.645500000 | 0.006600000  |
| 7 | 3.743700000  | 2.119100000  | -0.322700000 |
| 7 | 1.985100000  | 0.821400000  | -0.064500000 |
| 6 | -1.560300000 | -3.001900000 | 0.856600000  |
| 6 | -0.573800000 | -3.649800000 | -0.135400000 |
| 6 | 0.621600000  | -2.780000000 | -0.375900000 |
| 6 | 3.121300000  | -1.305600000 | 0.786000000  |
| 7 | 1.845200000  | -3.252700000 | -0.142000000 |
| 8 | 0.489600000  | -1.601200000 | -0.774700000 |
| 6 | 3.016100000  | -2.394200000 | -0.309400000 |
| 1 | -4.478500000 | -2.940900000 | 0.210200000  |
| 1 | -3.282600000 | 1.000700000  | -0.705100000 |
| 1 | 5.268100000  | 0.734700000  | 0.315900000  |
| 1 | 1.771500000  | 2.842600000  | -0.748700000 |

|    |              |              |              |
|----|--------------|--------------|--------------|
| 1  | -0.999100000 | -2.612700000 | 1.718700000  |
| 1  | -2.193300000 | -3.802000000 | 1.256600000  |
| 1  | 4.046100000  | -1.458100000 | 1.354100000  |
| 1  | 2.304800000  | -1.452000000 | 1.505400000  |
| 1  | -1.069300000 | -3.818600000 | -1.100600000 |
| 1  | -0.265400000 | -4.630300000 | 0.244700000  |
| 1  | 1.963700000  | -4.214500000 | 0.152500000  |
| 1  | 2.963400000  | -1.934800000 | -1.303000000 |
| 1  | 3.893000000  | -3.045300000 | -0.297600000 |
| 1  | 4.301300000  | 2.937100000  | -0.534600000 |
| 1  | -5.217800000 | -0.645700000 | -0.619900000 |
| 1  | -1.150100000 | 2.872400000  | -1.873800000 |
| 6  | -1.189000000 | 3.089400000  | -0.813700000 |
| 7  | -0.849200000 | 2.249600000  | 0.155800000  |
| 7  | -1.591800000 | 4.267500000  | -0.295400000 |
| 6  | -1.046300000 | 2.933000000  | 1.339800000  |
| 6  | -1.508100000 | 4.189700000  | 1.074000000  |
| 1  | -1.901300000 | 5.072200000  | -0.827100000 |
| 1  | -1.777800000 | 5.012400000  | 1.720000000  |
| 1  | -0.847300000 | 2.482800000  | 2.302200000  |
| 26 | -0.119300000 | 0.237900000  | -0.080400000 |
| 8  | 0.036000000  | -0.073200000 | 2.114500000  |
| 1  | 0.760600000  | 0.254300000  | 2.662900000  |
| 1  | -0.710200000 | -0.258700000 | 2.699100000  |
| 8  | -0.280100000 | 0.647000000  | -2.319900000 |
| 1  | 0.574100000  | 0.581200000  | -2.767400000 |
| 1  | -0.849200000 | 0.003900000  | -2.763200000 |

**19<sup>3+</sup> [Fe(Ohishis)(Im)(H<sub>2</sub>O)<sub>2</sub>]<sup>3+</sup> Sextet**

|   |              |              |              |
|---|--------------|--------------|--------------|
| 6 | -2.984600000 | -3.119100000 | 0.180900000  |
| 6 | -3.051900000 | -0.947400000 | -0.202800000 |
| 6 | -1.714900000 | -2.619300000 | 0.318400000  |
| 6 | 3.655400000  | 2.199800000  | 0.251500000  |
| 6 | 1.548400000  | 2.723800000  | -0.134600000 |
| 6 | 2.907500000  | 1.052200000  | 0.331900000  |
| 7 | -3.798200000 | -2.057200000 | -0.149500000 |
| 7 | -1.767400000 | -1.234800000 | 0.068700000  |
| 7 | 2.786300000  | 3.225700000  | -0.047300000 |
| 7 | 1.563700000  | 1.397200000  | 0.080400000  |
| 6 | -0.516300000 | -3.414800000 | 0.765700000  |
| 6 | 0.628500000  | -3.642600000 | -0.256500000 |
| 6 | 1.513500000  | -2.436800000 | -0.384600000 |
| 6 | 3.446400000  | -0.303400000 | 0.709300000  |
| 7 | 2.827100000  | -2.514700000 | -0.358200000 |
| 8 | 0.991000000  | -1.274600000 | -0.510100000 |
| 6 | 3.694300000  | -1.322000000 | -0.447900000 |
| 1 | -3.368800000 | -4.121700000 | 0.301400000  |
| 1 | -3.448000000 | 0.029700000  | -0.428800000 |
| 1 | 4.713600000  | 2.366400000  | 0.392300000  |
| 1 | 0.674600000  | 3.321100000  | -0.340700000 |
| 1 | -0.098300000 | -2.992600000 | 1.687700000  |

|    |              |              |              |
|----|--------------|--------------|--------------|
| 1  | -0.889100000 | -4.403500000 | 1.046100000  |
| 1  | 4.406000000  | -0.123500000 | 1.201800000  |
| 1  | 2.815900000  | -0.770100000 | 1.472500000  |
| 1  | 0.217900000  | -3.871700000 | -1.248100000 |
| 1  | 1.220900000  | -4.509800000 | 0.048800000  |
| 1  | 3.262600000  | -3.429000000 | -0.276700000 |
| 1  | 3.546400000  | -0.858200000 | -1.426900000 |
| 1  | 4.718900000  | -1.692600000 | -0.412600000 |
| 1  | 3.039300000  | 4.202100000  | -0.165900000 |
| 1  | -4.799600000 | -2.105700000 | -0.312100000 |
| 1  | -1.875300000 | 2.331400000  | -2.064400000 |
| 6  | -2.042000000 | 2.512100000  | -1.013900000 |
| 7  | -1.502600000 | 1.817200000  | 0.003700000  |
| 7  | -2.833500000 | 3.484400000  | -0.532800000 |
| 6  | -1.994100000 | 2.398700000  | 1.172700000  |
| 6  | -2.821800000 | 3.435700000  | 0.846300000  |
| 1  | -3.356300000 | 4.148700000  | -1.096700000 |
| 1  | -3.386700000 | 4.123500000  | 1.458400000  |
| 1  | -1.725100000 | 2.041700000  | 2.152900000  |
| 26 | -0.178100000 | 0.175100000  | -0.085600000 |
| 8  | -0.056400000 | 0.023700000  | 2.059600000  |
| 1  | 0.575000000  | 0.499200000  | 2.622500000  |
| 1  | -0.667300000 | -0.467900000 | 2.631000000  |
| 8  | -0.335400000 | 0.426900000  | -2.268300000 |
| 1  | 0.467800000  | 0.679900000  | -2.753300000 |
| 1  | -0.747700000 | -0.284600000 | -2.786000000 |

**20<sup>2+</sup> [Fe(Nhishis)(Ph)(H<sub>2</sub>O)] Quintet**

|   |              |              |              |
|---|--------------|--------------|--------------|
| 6 | -1.690000000 | 4.009300000  | -0.431500000 |
| 6 | -2.461600000 | 1.931700000  | -0.531400000 |
| 6 | -0.641100000 | 3.130200000  | -0.547200000 |
| 6 | 3.996100000  | -2.328800000 | -0.535000000 |
| 6 | 2.430900000  | -1.581400000 | -1.907100000 |
| 6 | 3.007800000  | -1.707400000 | 0.190800000  |
| 7 | -2.836800000 | 3.232200000  | -0.425100000 |
| 7 | -1.145000000 | 1.840500000  | -0.611100000 |
| 7 | 3.612200000  | -2.242600000 | -1.860000000 |
| 7 | 2.036500000  | -1.244600000 | -0.687400000 |
| 6 | 0.838500000  | 3.356700000  | -0.567200000 |
| 6 | 1.566200000  | 2.787300000  | 0.665100000  |
| 6 | 2.928500000  | -1.569300000 | 1.690300000  |
| 6 | 1.809400000  | -0.650700000 | 2.203600000  |
| 1 | -1.723500000 | 5.084600000  | -0.352200000 |
| 1 | -3.153300000 | 1.101900000  | -0.524500000 |
| 1 | 4.910700000  | -2.813300000 | -0.230700000 |
| 1 | 1.896900000  | -1.353600000 | -2.817200000 |
| 1 | 1.257700000  | 2.903500000  | -1.477100000 |
| 1 | 1.043100000  | 4.431100000  | -0.629400000 |
| 1 | 2.786200000  | -2.567400000 | 2.125200000  |
| 1 | 3.887800000  | -1.198200000 | 2.069400000  |



|    |              |              |              |
|----|--------------|--------------|--------------|
| 1  | 1.228600000  | 3.324000000  | 1.563500000  |
| 1  | 2.637900000  | 3.008700000  | 0.571400000  |
| 1  | 0.841800000  | -1.003300000 | 1.826800000  |
| 1  | 1.779000000  | -0.732100000 | 3.294100000  |
| 1  | 4.122400000  | -2.597400000 | -2.654800000 |
| 1  | -3.784900000 | 3.567300000  | -0.339400000 |
| 7  | 1.359500000  | 1.346800000  | 0.838400000  |
| 6  | 2.047700000  | 0.831600000  | 1.886900000  |
| 8  | 2.840000000  | 1.471200000  | 2.603000000  |
| 26 | 0.293000000  | 0.140900000  | -0.385100000 |
| 8  | -0.073100000 | -0.172800000 | -2.829200000 |
| 1  | -0.724800000 | -0.751200000 | -2.362700000 |
| 1  | -0.572400000 | 0.599500000  | -3.123900000 |
| 8  | -1.119300000 | -1.195200000 | -0.665200000 |
| 6  | -2.217200000 | -1.610500000 | -0.032100000 |
| 6  | -2.471700000 | -1.282300000 | 1.318900000  |
| 6  | -3.172500000 | -2.400400000 | -0.711000000 |
| 6  | -3.632000000 | -1.726300000 | 1.956200000  |
| 1  | -1.745900000 | -0.679000000 | 1.858400000  |
| 6  | -4.329200000 | -2.836800000 | -0.064700000 |
| 1  | -2.980300000 | -2.668800000 | -1.746500000 |
| 6  | -4.572600000 | -2.504800000 | 1.273400000  |
| 1  | -3.798900000 | -1.462300000 | 2.997700000  |
| 1  | -5.045400000 | -3.446300000 | -0.610600000 |
| 1  | -5.472000000 | -2.850400000 | 1.774000000  |

**20<sup>3+</sup> [Fe(Nhishis)(Ph)(H<sub>2</sub>O)]<sup>1+</sup> Sextet**

|   |              |              |              |
|---|--------------|--------------|--------------|
| 6 | -1.438000000 | 4.134500000  | -0.543800000 |
| 6 | -1.223000000 | 2.472800000  | -1.990100000 |
| 6 | -0.672100000 | 3.145500000  | 0.021100000  |
| 6 | 3.253800000  | -2.915300000 | -0.794400000 |
| 6 | 1.088900000  | -2.715000000 | -1.227100000 |
| 6 | 2.854300000  | -1.633500000 | -0.509300000 |
| 7 | -1.768900000 | 3.693400000  | -1.810900000 |
| 7 | -0.544100000 | 2.112800000  | -0.904500000 |
| 7 | 2.125900000  | -3.577500000 | -1.245200000 |
| 7 | 1.499600000  | -1.527800000 | -0.792900000 |
| 6 | -0.079500000 | 3.060800000  | 1.396500000  |
| 6 | -0.070600000 | 1.621200000  | 1.943000000  |
| 6 | 3.624900000  | -0.497000000 | 0.086900000  |
| 6 | 3.289900000  | -0.197700000 | 1.568700000  |
| 1 | -1.771700000 | 5.085800000  | -0.160200000 |
| 1 | -1.350000000 | 1.880200000  | -2.883700000 |
| 1 | 4.211600000  | -3.403900000 | -0.706400000 |
| 1 | 0.079600000  | -2.963300000 | -1.518400000 |
| 1 | 0.946800000  | 3.445400000  | 1.410800000  |
| 1 | -0.661800000 | 3.700000000  | 2.068800000  |
| 1 | 4.688500000  | -0.747500000 | 0.028800000  |
| 1 | 3.495000000  | 0.410100000  | -0.517200000 |
| 1 | -1.056600000 | 1.165100000  | 1.795900000  |
| 1 | 0.134000000  | 1.648300000  | 3.014900000  |

|    |              |              |              |
|----|--------------|--------------|--------------|
| 1  | 3.079400000  | -1.140200000 | 2.090500000  |
| 1  | 4.176400000  | 0.223900000  | 2.046900000  |
| 1  | 2.079000000  | -4.546500000 | -1.530100000 |
| 1  | -2.343200000 | 4.186300000  | -2.481100000 |
| 7  | 0.949200000  | 0.767600000  | 1.284900000  |
| 6  | 2.169500000  | 0.778200000  | 1.946800000  |
| 8  | 2.376000000  | 1.519400000  | 2.908500000  |
| 26 | 0.310800000  | 0.183800000  | -0.449000000 |
| 8  | 1.368400000  | 0.760000000  | -2.391700000 |
| 1  | 1.569000000  | 1.686300000  | -2.586300000 |
| 1  | 2.062900000  | 0.212400000  | -2.783500000 |
| 8  | -1.262900000 | -0.745300000 | -0.616600000 |
| 6  | -2.285000000 | -1.336500000 | 0.017900000  |
| 6  | -2.202900000 | -1.670300000 | 1.386200000  |
| 6  | -3.457000000 | -1.640600000 | -0.704800000 |
| 6  | -3.280100000 | -2.293000000 | 2.013200000  |
| 1  | -1.293500000 | -1.442500000 | 1.934500000  |
| 6  | -4.525900000 | -2.262500000 | -0.063800000 |
| 1  | -3.506300000 | -1.378700000 | -1.757200000 |
| 6  | -4.444900000 | -2.590800000 | 1.295200000  |
| 1  | -3.211500000 | -2.548600000 | 3.066400000  |
| 1  | -5.426900000 | -2.492700000 | -0.624600000 |
| 1  | -5.280500000 | -3.075500000 | 1.789600000  |
